# 1           **Seasonal shifts in the gut microbiome indicate plastic** 2                                   **responses to diet in wild geladas**

3  
4   Alice Baniel<sup>1, §</sup>, Katherine R Amato<sup>2</sup>, Jacinta C Beehner<sup>3,4</sup>, Thore J Bergman<sup>3,5</sup>, Arianne Mercer<sup>6</sup>,  
5   Rachel F Perlman<sup>7</sup>, Lauren Petrullo<sup>7</sup>, Laurie Reitsema<sup>8</sup>, Sierra Sams<sup>6</sup>, Amy Lu<sup>1,\*</sup>, Noah Snyder-  
6   Mackler<sup>6,9,10,11,\*</sup>

## 7 8   **Affiliations**

9   <sup>1</sup> Department of Anthropology, Stony Brook University, Stony Brook, NY 11794, USA

10   <sup>2</sup> Department of Anthropology, Northwestern University, Evanston, IL 60208, USA

11   <sup>3</sup> Department of Psychology, University of Michigan, Ann Arbor, MI 48109, USA

12   <sup>4</sup> Department of Anthropology, University of Michigan, Ann Arbor, MI 48109, USA

13   <sup>5</sup> Department of Ecology and Evolutionary Biology, University of Michigan, Ann Arbor, MI  
14   48109, USA

15   <sup>6</sup> Department of Psychology, University of Washington, Seattle, WA 98195, USA

16   <sup>7</sup> Interdepartmental Doctoral Program in Anthropological Sciences, Stony Brook University, Stony  
17   Brook, NY 11794, USA

18   <sup>8</sup> Department of Anthropology, University of Georgia, Athens, GA 30602, USA

19   <sup>9</sup> Center for Evolution and Medicine, Arizona State University, Tempe, AZ 85281, USA

20   <sup>10</sup> School of Life Sciences, Arizona State University, Tempe, AZ 85287, USA

21   <sup>11</sup> Department of Biology, University of Washington, Seattle, WA 98195, USA

22

23 \* Authors contributed equally

24 § Lead contact

25

26 **Correspondence:**

27 Alice Baniel (alice.baniel@gmail.com)

28 Amy Lu (amy.lu@stonybrook.edu)

29 Noah Snyder-Mackler (nsnyderm@asu.edu)

30 **ABSTRACT**

31 Animals have evolved numerous strategies to cope with energetic challenges, with dynamic  
32 changes to the gut microbiome potentially constituting one such strategy. We tested how proxies  
33 of food availability (rainfall) and thermoregulatory stress (temperature) predicted gut microbiome  
34 composition of geladas (*Theropithecus geladas*), a grazing, high-altitude primate inhabiting a  
35 seasonal environment. The gelada gut microbiome varied across seasons, reflecting more efficient  
36 digestion of the primary foods eaten at certain times of year. In rainier periods, the gut was  
37 dominated by cellulolytic/fermentative bacteria that specialized in digesting grass, while during  
38 dry periods the gut was dominated by bacteria that break down starches found in underground  
39 plant parts. Temperature had a smaller, but detectable, effect on the gut microbiome. We found an  
40 increase in microbes involved in metabolism and energy production during cold and dry periods,  
41 suggesting buffering when thermoregulatory and nutritional stress co-occurred. Our results  
42 suggest that the gelada gut microbiome may shift to compensate for host diet and energetic  
43 demands.

44

45 **KEYWORDS:** gut microbiome, graminivory, seasonality, thermoregulation, *Theropithecus*  
46 geladas, primates

47

## 48 INTRODUCTION

49 Obtaining sufficient nutrients is a fundamental challenge for most animals. Yet, the availability  
50 and nutritional content of food can vary temporally and spatially in response to changes in climate  
51 and geography. Nutritional demands further vary in response to thermoregulatory needs and life  
52 history processes, such as growth and reproduction (McNab 2002; Dufour and Sauter 2002).  
53 Animals have evolved a variety of behavioral and physiological strategies to cope with these  
54 shifting demands, including altered feeding and activity patterns and increased mobilization of  
55 stored fat to fuel energetic demands (Doran 1997; Gursky 2000; van Schaik and Brockman 2005;  
56 Dias et al. 2011). Recently, the gut microbiome has been proposed as an additional avenue by  
57 which animals can cope with changing dietary landscapes and energetic challenges (Candela et al.  
58 2012; David et al. 2014; Amato et al. 2015). The gastrointestinal tract of animals harbors a dense  
59 microbial community that helps to break down and ferment plant structural carbohydrates,  
60 producing short-chain fatty acids (SCFAs) that can be used as an energy source by hosts (Bäckhed  
61 2011; Flint et al. 2012; White et al. 2014). The absorption of SCFAs in the gut may be particularly  
62 important for herbivorous species, such as foregut and hindgut fermenters, which obtain as much  
63 as 40-90% of their energy requirements from bacterial degradation of complex plant  
64 polysaccharides (Bergman et al. 1965; Udén et al. 1982; Milton and McBee 1983; Popovich et al.  
65 1997). Additionally, variation in gut microbiome composition affects the efficiency of caloric  
66 harvest and the metabolic programming of the host (De Filippo et al. 2010; Bäckhed 2011;  
67 Krajmalnik-Brown et al. 2012; Tremaroli and Bäckhed 2012; Hanning and Diaz-Sanchez 2015).  
68 For instance, in mice (*Mus musculus*) and humans, obese and lean individuals have strikingly  
69 different gut microbiota composition, with obese phenotypes being associated with higher energy

70 extraction from diet and increased lipogenesis (Turnbaugh et al. 2006; Turnbaugh and Gordon  
71 2009; Tseng and Wu 2019).

72 In wild mammals, the gut microbiome responds rapidly to seasonal and dietary changes  
73 (Maurice et al. 2015; Liu et al. 2019; Sun et al. 2016; Amato et al. 2015; Mallott et al. 2018; Ren  
74 et al. 2016; Springer et al. 2017), presumably to buffer seasonal energetic challenges (Amato et al.  
75 2015; Sun et al. 2016). For example, a simultaneous increase in bacterial taxa involved in fiber  
76 fermentation and in SCFA concentrations during the dry season were suggested to allow Mexican  
77 black howler monkeys (*Alouatta pigra*) to maintain energy balance during energetic shortfalls  
78 without changes in activity or ranging patterns (Amato et al. 2015). Moreover, gut bacteria increase  
79 intestinal absorptive capacity, energy homeostasis, and fat burning during cold periods in mice  
80 (Chevalier et al. 2015), and improve digestive efficiency and SCFA production in energetically  
81 challenged ruminants living at cold and high-altitude (Zhang et al. 2016; Li et al. 2018). These  
82 microbial shifts likely come at some cost. For instance, increases in microbes that improve host  
83 metabolism under certain conditions may reduce the abundance of microbes that support host  
84 immune function (Amato et al. 2014; Reese and Kearney 2019). However, in seasonal and  
85 nutritionally challenging environments, enduring these trade-offs may be necessary for host  
86 survival and reproduction.

87 Geladas (*Theropithecus gelada*) represent an excellent system to investigate the  
88 relationship between gut microbiota composition and seasonal variation in host diet and energy  
89 needs. Despite being the only graminivorous primate with up to 90% of their diet comprised of  
90 grass (Fashing et al. 2014; Jarvey et al. 2018), their gastrointestinal tract appears poorly adapted  
91 to this specialization (but see (Wrangham 1980; Venkataraman et al. 2014) for dental, manual, and  
92 locomotor adaptations), closely resembling their closest phylogenetic relatives, baboons (*Papio*

93 spp.) – a taxon that is omnivorous (Mau et al. 2011). To compensate, geladas may rely heavily on  
94 their gut microbiota to maximize nutrient extraction from grasses, likely through hindgut  
95 fermentation (Mau et al. 2011; Trosvik et al. 2018). Moreover, geladas live in a high-altitude,  
96 energetically demanding environment that exhibits marked inter- and intra-annual fluctuation in  
97 rainfall and temperature (Jarvey et al. 2018; Tinsley Johnson et al. 2018). During rainier months,  
98 when grass is abundant, they focus almost exclusively on eating above-ground graminoid leaves  
99 and seeds, and during drier months, when grass availability decreases, they shift heavily to  
100 underground foods (rhizomes, roots, corms, bulbs) (Hunter 2001; Jarvey et al. 2018). This diet  
101 provides distinct challenges. Underground foods are considered a fallback food for geladas since  
102 they take additional time and effort to harvest, are harder to process, and are relied upon only when  
103 grasses are less abundant (Venkataraman et al. 2014; Jarvey et al. 2018). Despite being considered  
104 a fallback food, these underground foods are rich in starches and carbohydrates, suggesting that  
105 they contain more nutritional energy than grass (Dominy et al. 2008). This high amount of energy,  
106 however, comes at some cost: roots and rhizomes are generally higher in fibers and lignin - and  
107 thus harder to digest than grasses. In addition to these nutritional challenges, ambient temperatures  
108 frequently drop to near freezing in some months, and the metabolic costs of thermoregulation are  
109 known to strongly influence gelada physiology (Beehner and McCann 2008) and the timing of  
110 reproduction (Tinsley Johnson et al. 2018; Carrera et al. 2020). Thus, seasonal dietary shifts and  
111 temperature variation may entail distinct digestive and thermoregulatory challenges.

112         One previous study on geladas from Guassa, Ethiopia found that gut microbial  
113 communities of adult females do indeed shift across seasons (Trosvik et al. 2018), supporting the  
114 hypothesis that the gut microbiome may help hosts confront environmental challenges. This study  
115 focused on adult females and assessed seasonal variation by separating the samples into two

116 categorical seasons (i.e., rainy, dry). Our study expands on this study by including adult males,  
117 incorporating continuous climatic data across several years, and examining proxies of  
118 thermoregulatory stress (in addition to diet) as factors that can influence the composition and  
119 function of the gelada gut microbiome. Indeed, rainfall and temperature vary independently of  
120 each other and represent distinct ecological challenges in gelada ecosystems. Therefore, we were  
121 interested in further testing which aspect of gelada ecology more strongly determines seasonal  
122 microbiome shifts.

123         We analysed the gut microbiome composition and predicted microbiome function in 758  
124 fecal samples across 5 years from 48 adult male and 86 adult female geladas living in the Ethiopian  
125 highlands in the Simien Mountains National Park. The Simien Mountains Gelada Research Project  
126 (SMGRP) has been collecting detailed climatologic, demographic, and behavioral data from this  
127 study population since 2006, allowing us to examine how ecological (rainfall and temperature)  
128 and individual (group membership, sex, reproductive status, and age) factors influence gelada gut  
129 microbiome composition. We hypothesized that ecological factors would be more strongly  
130 associated with variation in the gelada microbiome than individual factors, and that rainfall and  
131 temperature would have independent effects. In particular, we expected that rainfall, which is a  
132 good proxy for grass availability (Jarvey et al. 2018), would have the strongest effect on the gelada  
133 gut microbiome. Specifically, we predicted that the taxonomic changes associated with rainfall  
134 would mainly reflect a shift to grass-based versus underground food-based diet, in order to allow  
135 individuals to maximize energy extraction from those seasonal foods. We found that the gelada  
136 microbiome exhibited drastic shifts related to climatological variables; but individual variables,  
137 like age and sex, had minimal effects. Rainfall and temperature exerted independent effects on the  
138 microbial composition and predicted function – with rainfall having a stronger effect on the gelada

139 gut bacteria. High rainfall, which is correlated with grass availability (Jarvey et al. 2018), was  
140 associated with more cellulolytic and fibrolytic bacterial taxa, when graminoid leaves were the  
141 main food source. Dry periods, which are correlated to underground food consumption (Jarvey et  
142 al. 2018), were associated with amylolytic and methanogenic taxa. Cold periods were further  
143 characterized by more amylolytic taxa, and hot periods by more methanogenic taxa. In both drier  
144 and colder periods, the gut microbiome shifted to predicted functions that suggested increased  
145 digestive efficiency, including energy, amino acid and lipid metabolism. Overall, gelada gut  
146 microbial composition covaried with diet and temperature in a pattern that suggests plastic but  
147 distinct responses to different dietary and metabolic challenges.

148

## 149 **RESULTS**

### 150 **The gelada gut microbiome**

151 We identified 3,295 amplicon specific variants (ASVs) in 758 fecal samples (mean±SD=813±243  
152 ASVs per sample, range=92-1730) using deep 16S rRNA gene amplicon sequencing. These 3,295  
153 ASVs came from 16 different phyla, 65 families, and 200 genera (Table S1, Figure 1, Figures S1-  
154 S2). Of the 3,295 ASVs, 170 (5%) were present in at least 90% of samples and form what can be  
155 considered the “core microbiota” of geladas (Table S2). The four most abundant bacterial phyla  
156 were *Firmicutes* (32%), *Kiritimatiellaeota* (formerly called *Verrucomicrobiota subdivision 5*;  
157 26%), *Bacteroidetes* (23%), and *Spirochaetes* (5%) (Table S1, Figure 1A). All microbes assigned  
158 to *Kiritimatiellaeota* were part of the *RFP12* family and represent almost one quarter of the gelada  
159 gut microbiome (mean 26%, range 0.02%-70%, Figure 1B). Although the metabolic function of  
160 *RFP12* remains unknown, those bacteria have been found in high quantities in the gut of some  
161 domestic horse (*Equus ferus caballus*) and sheep (*Ovis aries*) populations (Steelman et al. 2012;  
162 Costa et al. 2015; Wang et al. 2017) and could have some fermentative function. Other taxa found



163 at high frequency in the guts of ruminants and herbivorous hindgut fermenters were also prevalent  
 164 in the gelada gut, including many cellulolytic/fibrolytic (13% *Ruminococcaceae*, 6%  
 165 *Lachnospiraceae*, 4% *Clostridiales vadinBB60 group*, 1.5% *Fibrobacteraceae*) and fermentative  
 166 families (5.3% *Rikenellaceae*, 5% *Prevotellaceae*, 4.1% *Bacteroidales F082*) (Table S1, Figure  
 167 1B and S1). The *Spirochaetes* phylum was mostly composed of *Treponema* (3.5%), a genus  
 168 involved in lignocellulose degradation (Warnecke et al. 2007).  
 169

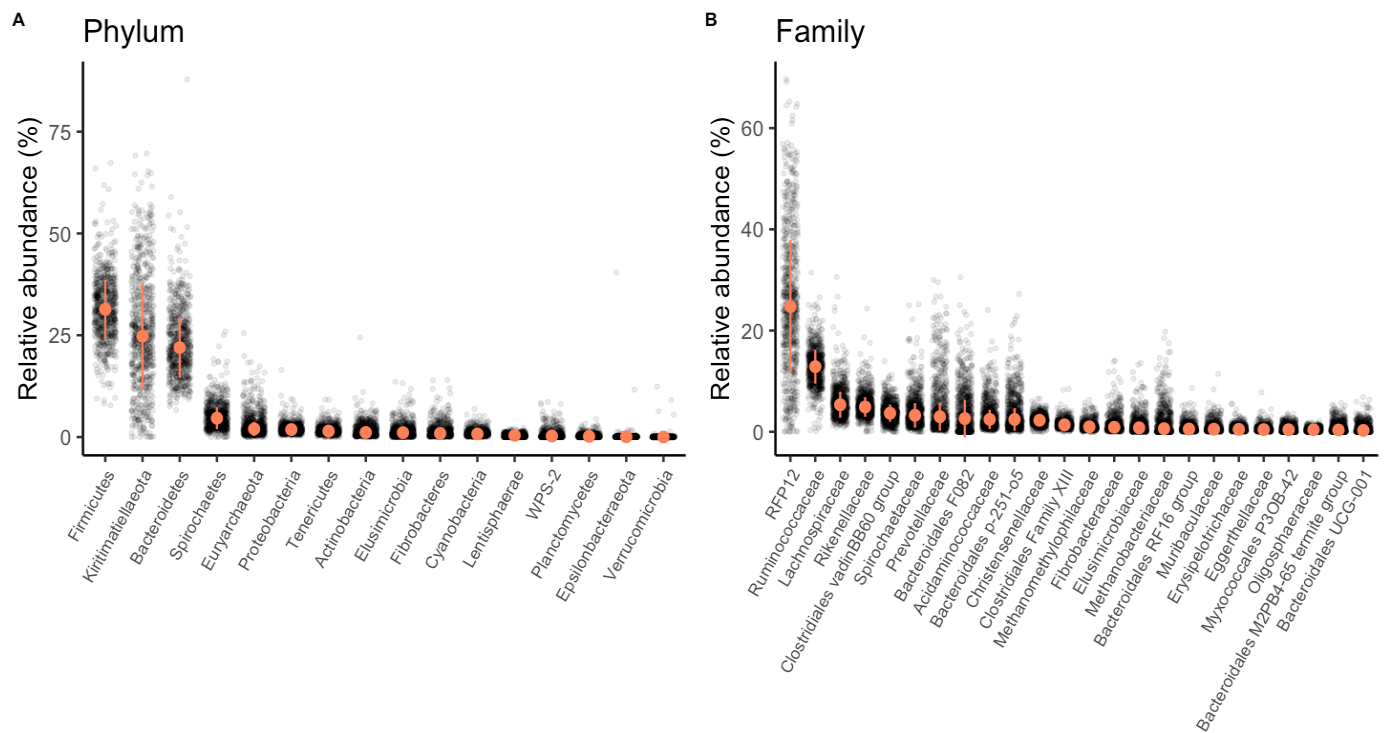

170  
 171 **Figure 1. Taxonomic composition of the geladas gut at the phylum and family levels.** Relative abundance (A) of all bacterial  
 172 phyla and (B) of the 24 most abundant families (whose relative abundance>0.02%) in the gelada feces. The median and median  
 173 absolute deviation (error limit) are represented in orange.

174  
 175 **Dietary changes**

176 To examine how seasonal variation in rainfall and temperature was associated with changes in the  
 177 gelada gut microbiome, we used measures of true climatic conditions, including monthly

178 cumulative rainfall (an appropriate proxy of grass availability in the Simiens: (Jarvey et al. 2018))  
179 and average monthly minimum temperature (a proxy of thermoregulatory constraint: (Beehner and  
180 McCann 2008; Tinsley Johnson et al. 2018)). At the level of within-sample community diversity  
181 (“alpha diversity”), we found that cumulative rainfall was positively associated with Shannon  
182 evenness (Table 1, Figure 2A,C) but had no effect on bacterial richness or Faith’s phylogenetic  
183 diversity (Table S3, Figure S3). Thus, rainfall was associated with the relative abundance of ASVs  
184 within a sample but not the absolute number of ASVs or their phylogenetic diversity.

185

186 **Table 1.** Determinants of alpha diversity, as measured by the Shannon index.

| Fixed factor               | Estimate | SE   | 95% confidence interval | LRT   | P-value          |
|----------------------------|----------|------|-------------------------|-------|------------------|
| <b>Sex (male)</b>          | -0.12    | 0.04 | [-0.20 ; -0.05]         | 9.27  | <b>0.002</b>     |
| Age                        | 0.01     | 0.02 | [-0.02 ; 0.04]          | 0.49  | 0.484            |
| <b>Cumulative rainfall</b> | 0.05     | 0.02 | [0.02 ; 0.08]           | 12.13 | <b>&lt;0.001</b> |
| Min temperature            | 0.00     | 0.01 | [-0.03 ; 0.03]          | 0.04  | 0.848            |
| <b>Sequencing depth</b>    | 0.07     | 0.01 | [0.04 ; 0.10]           | 24.24 | <b>&lt;0.001</b> |

187 Parameters and tests are based on linear mixed models of 758 samples and 131 individuals, controlling for individual identity and  
188 unit membership. Factors with p-values less than 0.05 are highlighted in bold.

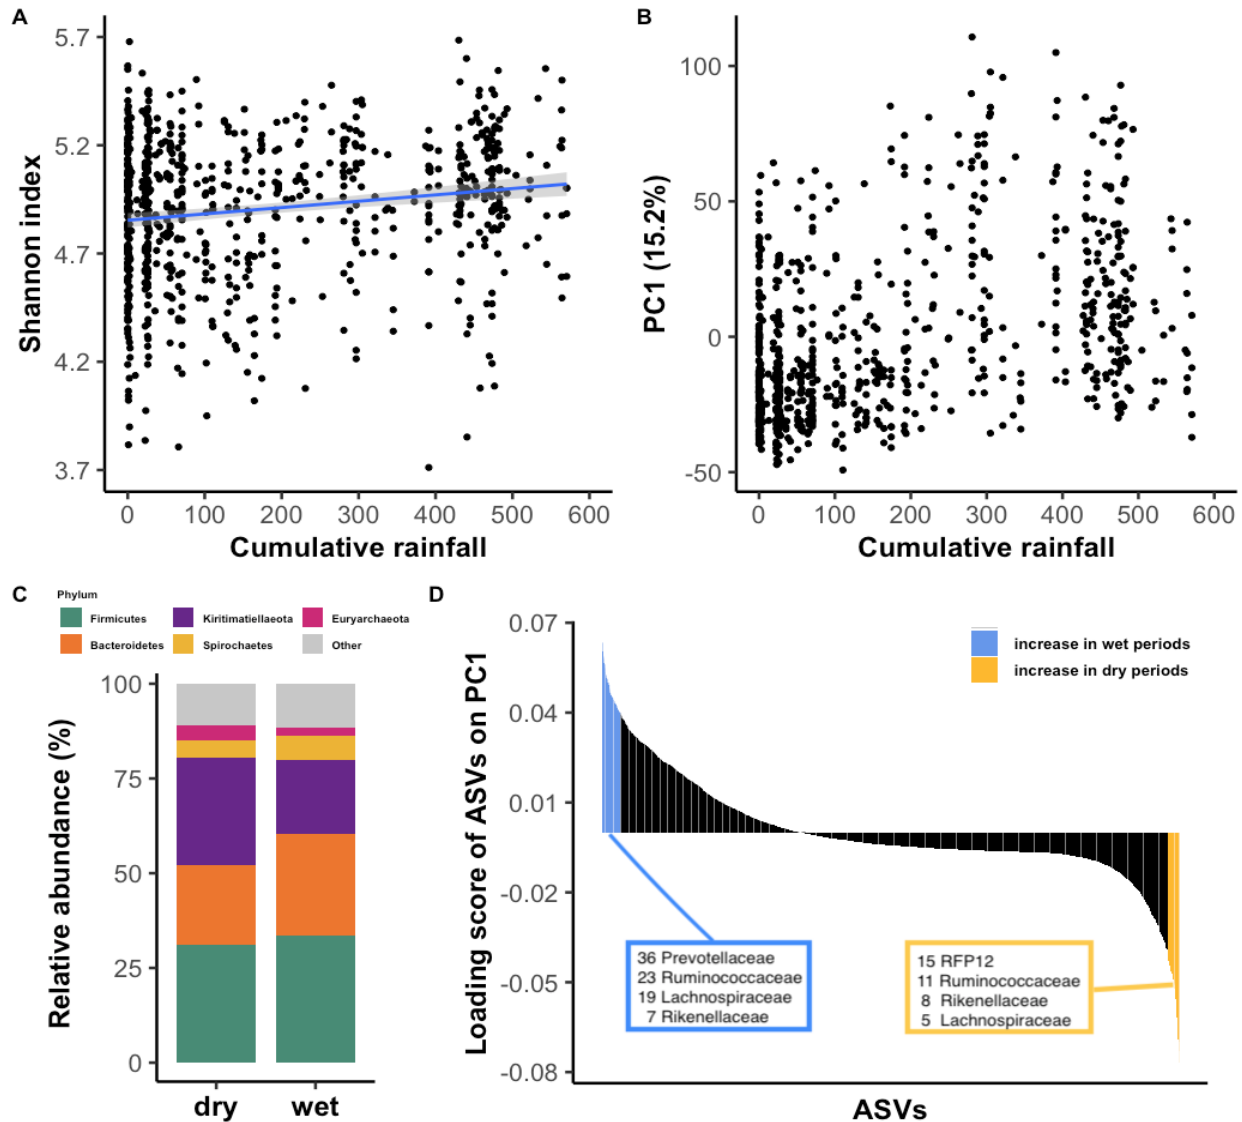

189

190 **Figure 2. Rainfall structures the gelada gut microbiome. (A)** Partial residual plot of Shannon alpha diversity index according

191 to cumulative rainfall (in mm). Black dots represent the partial residuals from the LMM (i.e. showing the association between

192 cumulative rainfall and alpha diversity, while controlling for all other predictors). The blue line and confidence intervals come from

193 a linear regression (for representation only). Seven outlier samples (with a particularly low Shannon index) were omitted for clarity

194 of representation. **(B)** Visualization of between-sample dissimilarity (based on Aitchison distance) on the first principal component

195 (PC1) according to cumulative rainfall. **(C)** Compositional barplot of the five most abundant phyla in the dry (<100mm of rain in

196 the past month, N=362) and wet (>200mm of rain in the past month, N=282) samples (cumulative rainfall was converted to a

197 categorical variable for representation purposes). **(D)** Loading scores of each amplicon sequence variant (ASV) on the first principal

198 component. ASVs with a loading score >0.4 (characteristics of the wet season) and <-0.4 (characteristic of the dry season) are

199 colored.

200 Cumulative rainfall significantly explained 3.3% of the overall compositional dissimilarity  
201 - or beta diversity - between samples (as measured by Aitchison distance) (Table 2), which was  
202 nonetheless less than that explained by two demographic variables, individual identity and unit  
203 (social group) membership (20% and 6%, respectively; Table 2). The first principal component of  
204 beta diversity, which explained 15% of variation, was strongly associated with rainfall ( $r=0.43$ ,  
205  $t=12.93$ ,  $df=756$ ,  $p<0.001$ , Figure 2B). The ASVs that loaded positively on PC1 (i.e. correlated  
206 with higher rainfall, Figure 2D) were primarily from the families *Prevotellaceae*,  
207 *Ruminococcaceae*, and *Lachnospiraceae* (Table S4 and S5). By contrast, the ASVs that loaded  
208 negatively on PC1 (i.e. more abundant in low rainfall, Figure 2D) belonged to the family *RFP12*  
209 and a different subset of *Ruminococcaceae* that were not abundant during the wet season (Table  
210 S4 and S5).

211

212 **Table 2.** Results of PERMANOVA testing for the predictors that significantly structure the gut microbiome of geladas, using  
213 10,000 permutations and the Aitchison dissimilarity distance between samples. The R-squared values indicate the amount of  
214 between-sample variation explained by each variable.

| Factor                                 | R2 (%) | P-value          |
|----------------------------------------|--------|------------------|
| <b>Individual<sup>1</sup></b>          | 20.25  | <b>&lt;0.001</b> |
| <b>Sequencing depth<sup>2</sup></b>    | 3.77   | <b>&lt;0.001</b> |
| <b>Unit<sup>2</sup></b>                | 5.84   | <b>&lt;0.001</b> |
| <b>Cumulative rainfall<sup>2</sup></b> | 3.30   | <b>&lt;0.001</b> |
| <b>Min temperature<sup>2</sup></b>     | 0.33   | <b>&lt;0.001</b> |
| <b>Sex<sup>2</sup></b>                 | 0.23   | <b>0.012</b>     |
| <b>Age<sup>2</sup></b>                 | 0.19   | 0.045            |

215 <sup>1</sup> We first fit a model with individual identity as the only predictor in a PERMANOVA to estimate the sole effect of  
216 individual identity at explaining the overall gut composition of samples.

217 <sup>2</sup> We then fit a second PERMANOVA model where all other predictors were fit, stratifying on individual identity to  
218 control for pseudoreplication of samples from the same individual.

219

220 Cumulative rainfall predicted the relative abundance of gut microbes at all taxonomic  
221 levels and was significantly associated with the relative abundance of 63% of bacterial families  
222 tested (59-81% of taxa at other taxonomic levels, Figure 3,  $p_{BH} < 0.05$ ). Thus, across most taxa,  
223 there was a clear contrast in the relative abundance of gut bacteria between the wet and dry periods  
224 (Table S6, Figure 4). In wetter periods, there was an increase in several important fermentative  
225 families from the *Bacteroides* order (including *Prevotellaceae* and *Bacteroidaceae*), as well as in  
226 several cellulolytic/fibrolitic taxa (*Lachnospiraceae*, *Fibrobacteraceae*, *Spirochaetaceae* and  
227 several genera from the *Ruminococcaceae*; Figure 4 and 5A), suggesting improved digestive  
228 efficiency of plant cell wall polysaccharides at a time when the gelada diet consists mainly of  
229 grasses. In particular, nine *Prevotella* genera as well as the *Bacteroides* genus were higher during  
230 wetter periods than drier periods (Table S6, Figure 4B). There was also an increase in several  
231 proficient cellulolytic genera (e.g. *Senegalimassilia*, *Butyrivibrio*, *Saccharofermentans*,  
232 *Cellulosilyticum*, *Marvinbryantia*) (Table S6, Figure 4B). By contrast, the dry season was  
233 characterized by an increase in amyolytic genera (*Succinivibrio*; *Streptococcus* and *Pirellulaceae*  
234 *p-1088-a5 gut group*), in several efficient sugar-fermenting families (*Victivallales vadinBE97*,  
235 *Christensenellaceae*), and in the methane-producer *Methanobrevibacter*, a genus known to  
236 increase the rate of fermentation and digestive efficiency (Table S6, and Figures 4 and 5B).  
237 Consistent with our beta diversity analyses, we also found an increase in the relative abundance of  
238 the *RFP12* family during the dry season (Table S6, Figure 5B).

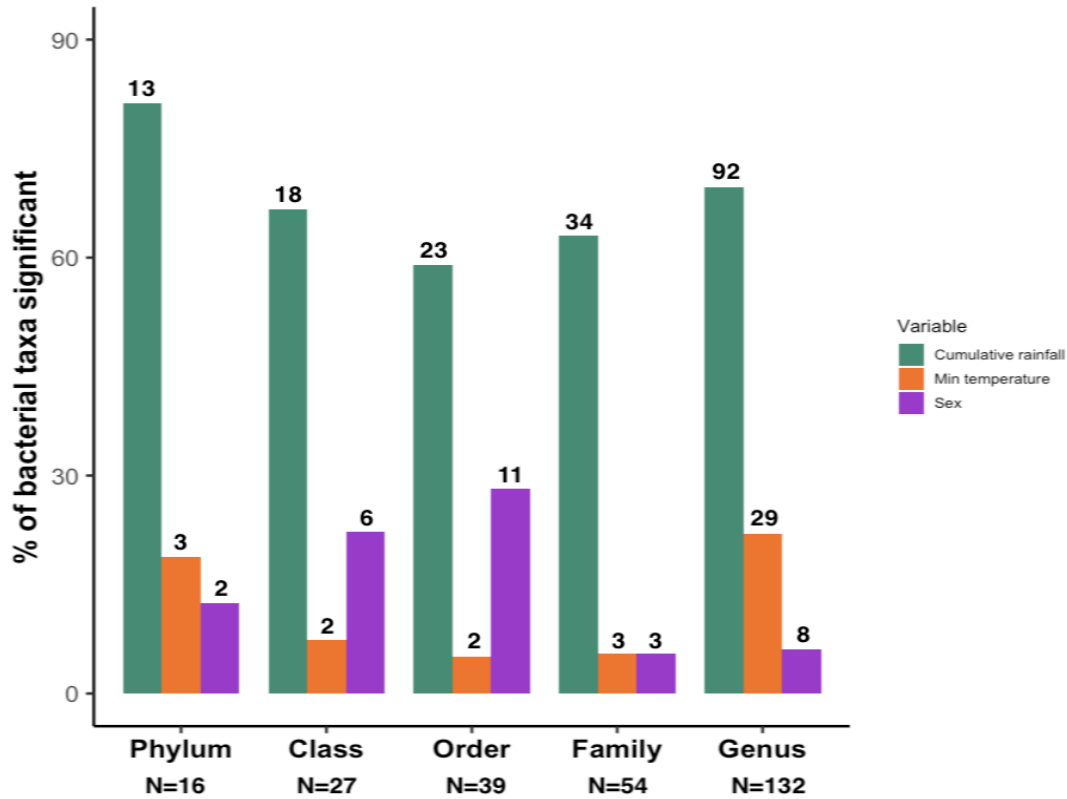

239

240

241 **Figure 3. Rainfall exerts the strongest effect on bacterial relative abundance.** Percent of taxa that are significantly associated  
242 ( $p_{BH} < 0.05$ ) with rainfall (purple bars), temperature (orange bars), or sex (green bars), across five taxonomic levels. For a given  
243 bacterial taxa, the significance of each predictor was assessed using a negative binomial GLMM fitted on the count of this taxa per  
244 sample (controlling for sequencing depth as an offset factor, and including individual and unit membership as random effects).  
245 Only taxa with  $p_{BH} < 0.05$  were considered significant. The numbers above the bars depict the number of taxa significantly  
246 differentially abundant, while the numbers below indicate the total taxa measured per level. Age was not significantly associated  
247 with relative abundance of any taxa at any level.

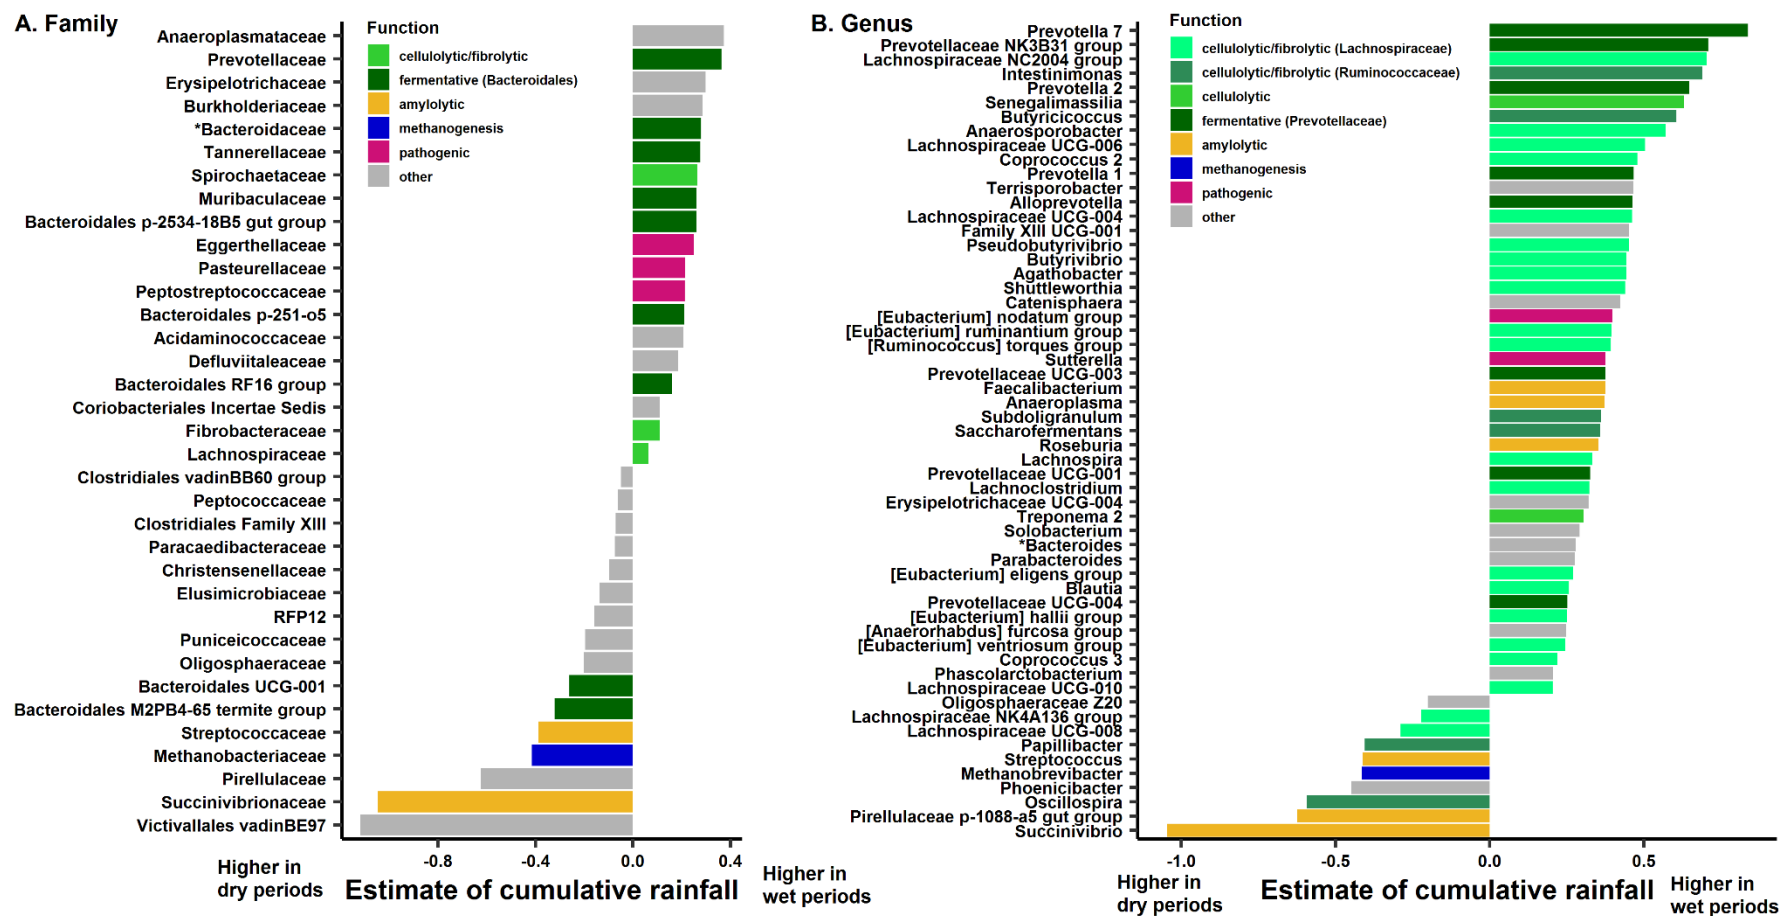

248

249 **Figure 4. Rainfall predicts the relative abundance of many bacterial taxa. (A) Families and (B) Genera that are found differentially abundant according to cumulative rainfall.**

250 The estimate for each taxa of the cumulative rainfall effect comes from a negative binomial GLMM fitted on the count of this taxa per sample (controlling for sequencing depth as

251 an offset factor, and including individual and unit membership as random effects). Taxa starting with “\*” were fit with a binomial model instead. Only taxa with  $p_{BH} < 0.05$  were

252 considered significant. For ease of representation on panel B, only genera with effect sizes  $> |0.2|$  are represented. The full list of differentially abundant genera can be found in Table

253 S8. Assignment of the “broad function” of a family or genus is for representation only, and is a simplification of the various functions subsumed within each taxonomic group.

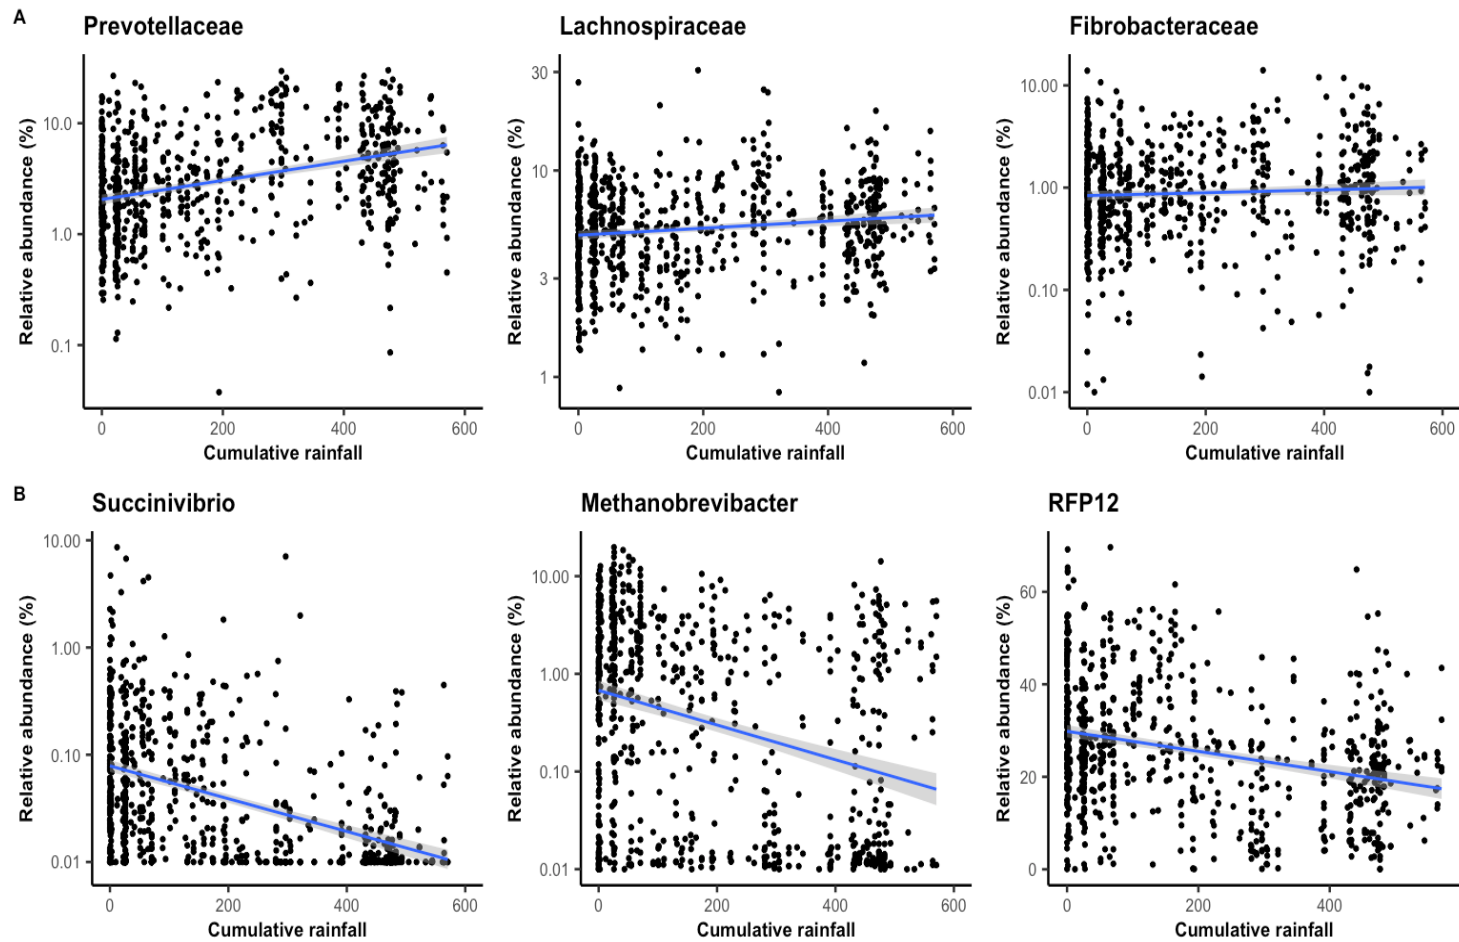

254

255 **Figure 5. Relative abundance in six bacterial taxa (family or genus) that are significantly associated with rainfall. (A) more abundant during the wet season**  
 256 **and (B) more abundant during the dry season. Note that the tick marks on the y-axis are spaced on a log<sub>10</sub> scale (except for RFP12 which is plotted on a raw scale**  
 257 **because of its high abundance). The blue line and confidence intervals come from a linear regression (for representation only). The significance of those effects**  
 258 **have been estimated using negative binomial GLMMs including individual and unit membership as random effects.**



259           The taxonomic changes associated with rainfall also corresponded to changes in the  
260 predicted function of the gelada gut microbiome (as assessed by PICRUSt2: (Douglas et al. 2019),  
261 NSTI mean $\pm$ SD=0.60 $\pm$ 0.13). During the wetter periods, functional changes tended to reflect the  
262 activity of the cellulolytic and fermentative bacterial taxa. Microbial pathways involved in the  
263 transport of molecules through bacterial membranes (e.g. ions, sugars, lipids, peptides), DNA  
264 replication and repair, and cell motility (Tables S7-S8, Figure 6, S4 and S5A) increased. We further  
265 found an increase in the metabolism of sugars (e.g. starch and sucrose metabolism, fructose,  
266 mannose, and galactose) (Figure S4 and S5A). Such activity probably reflects the exportation of  
267 sugar-cleaving enzymes and cellulosome complex across the outer membrane(Biddle et al. 2013;  
268 White et al. 2014) of fibrolytic bacteria (complex polysaccharides are too big to penetrate directly  
269 inside bacteria and have to be cleaved first) and the absorption of the soluble oligosaccharides back  
270 across the bacterial membrane (Biddle et al. 2013; White et al. 2014).

271           During drier periods, the gelada gut harbored a greater abundance of bacterial genes  
272 involved in energy, amino acid, and lipid metabolism (Tables S7-S8 and Figure 6A,C). In  
273 particular, cellular energy production and cellular activity were enhanced during this period, as  
274 evidenced by increases in pathways involved in the citric acid cycle, oxidative phosphorylation,  
275 and fatty acid synthesis and metabolism (Figure S4 and S5B). Other energy metabolism pathways  
276 also increased during drier periods, including the methane pathway and the carbon fixation  
277 pathways, which are important for generating energy in anaerobic bacteria (Figure S4 and S5B).  
278 Finally, drier periods were associated with an increase in functions related to the synthesis of  
279 proteinogenic amino acids (e.g. tryptophan), the translation and synthesis of proteins (Figure S4),  
280 and the synthesis of lipopolysaccharide.

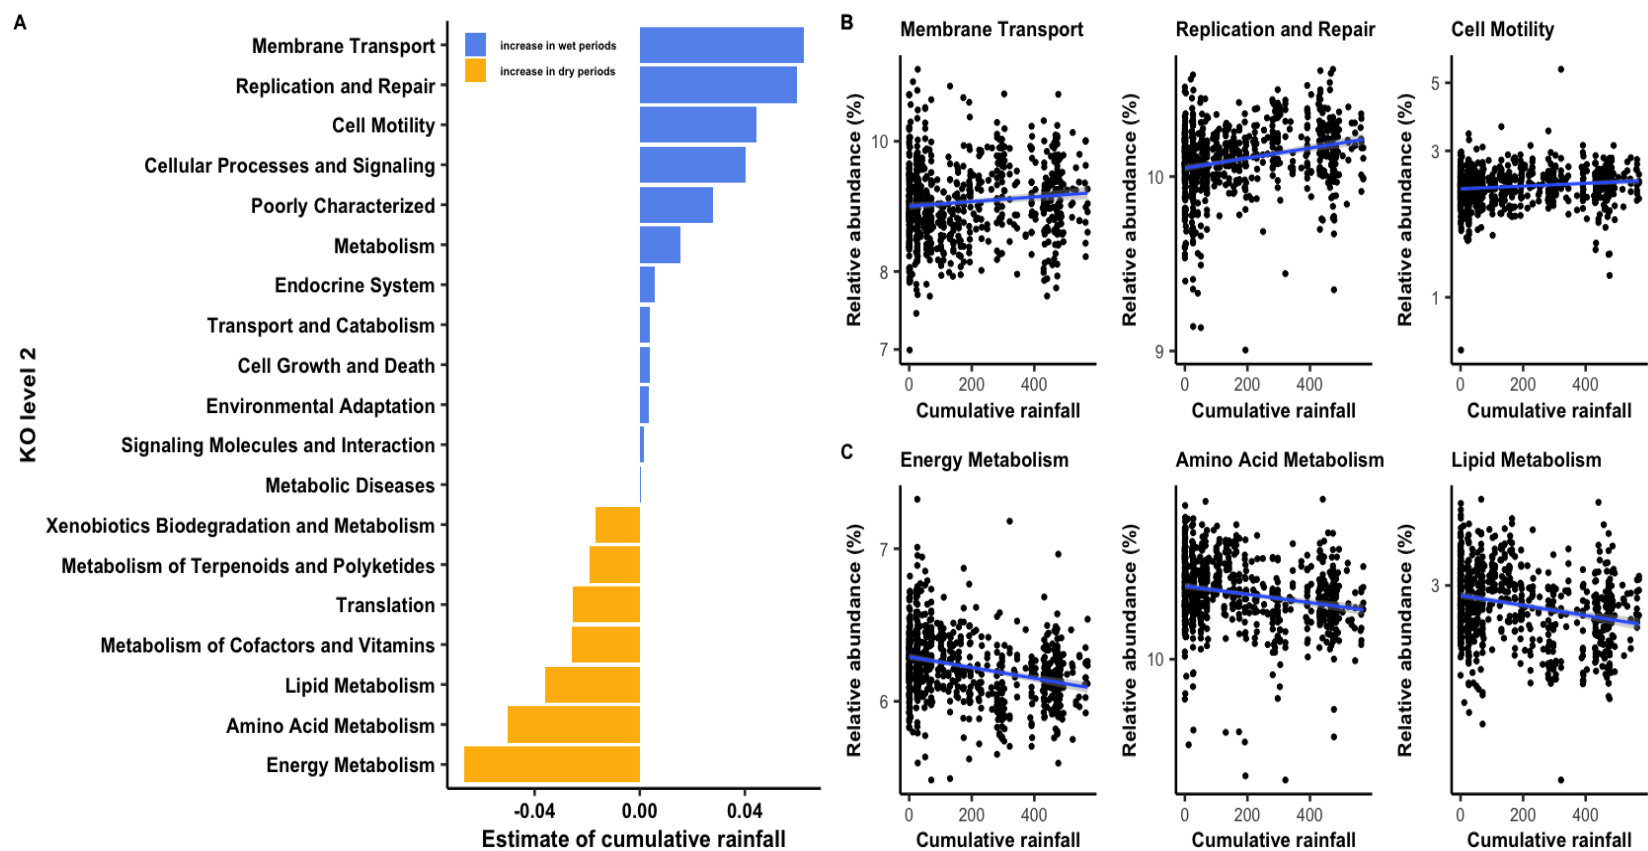

281

282 **Figure 6. Rainfall predicts the functional profile of the gut microbiome.** (A) Bacterial pathways at level 2 of KEGG Orthology (KO) that are differentially  
 283 abundant according to cumulative rainfall (in mm). The estimate of the “rainfall” effect for each pathway comes from a LMM fitted on the relative abundance of  
 284 each pathway per sample. Only pathways with  $p_{BH} < 0.05$  are reported. Relative abundance of the three most enhanced functional pathways during (B) the wet  
 285 season and (C) the dry season according to monthly cumulative rainfall. Note that the tick marks on the y-axis are spaced on a log10 scale. The blue line and  
 286 confidence intervals come from a linear regression (for representation only). The significance of the rainfall effect effects per pathway have been estimated using  
 287 LMMs including individual and unit membership as random effects.

## 288 **Temperature**

289 Compared to rainfall, minimum temperature had a much smaller impact on the gut microbiome.  
290 Average minimum temperature did not influence any metric of alpha diversity (Table 1 and S3,  
291 Figure S6A), and explained only 0.33% of the variation in beta diversity (Table 2, Figure S6B).  
292 Changes in temperature were significantly associated with the relative abundance of 5% of the  
293 families (5-22% at other taxonomic levels; Figure 3;  $p_{BH} < 0.05$ ). More specifically, colder  
294 temperatures were characterized by a greater abundance of two amylolytic genera (*Lactobacillus*  
295 and *Streptococcus*); in several sugar-fermenting (*Hydrogenoanaerobacterium*, *Clostridium sensu*  
296 *stricto* 1, *Coprococcus* 1) and cellulose-degrading bacteria (*Marvinbryantia* and two genera from  
297 the *Ruminococcaceae* family) (Table S6, Figure S7). By contrast, hotter temperatures were  
298 associated with an increase in *Verrucomicrobia*, in the methane-producer *Methanobrevibacter*,  
299 and in several cellulolytic/fibrololytic genera from the *Ruminococcaceae* and *Lachnospiraceae*  
300 families (Table S6, Figure S7).

301 Similar to our taxonomic analysis, we found that temperature had a much smaller effect of  
302 the predicted function of the gelada gut microbiome (Tables S7-S8, Figure S8). During colder  
303 periods, we found a predicted increase in bacterial pathways involved in lipid metabolism and  
304 energy production (notably in oxidative phosphorylation pathway; Figure S8). Other pathways that  
305 increased during colder periods involved DNA repair and recombination and the bacterial  
306 secretion system. During hotter weather, pathways were more-poorly characterized and less  
307 specific, with predicted increases in methane metabolism and ABC transport (a membrane  
308 transporter).

309

310

311 **Sex, reproductive state, and age**

312 The gut microbiome of females exhibited higher alpha diversity compared to males, regardless of  
313 the metric (richness, evenness, and Shannon index) (Table 1 and S3, Figure S9A). Across samples  
314 however, sex explained little between-sample variation (i.e. <1%) (Table 2, Figure S9B). We  
315 detected a handful of bacterial taxa that were differentially abundant according to sex (Table S6,  
316 Figure 3). At the phylum level, females harboured more *Verrucomicrobia* and *Proteobacteria*  
317 (particularly from class *Gammaproteobacteria*, *Deltaproteobacteria* and *Alphaproteobacteria*).  
318 At the family and genus levels, females had more taxa involved in lactic acid metabolism  
319 (*Lactobacillaceae*, *Anaerovibrio*), cellulolysis (*Saccharofermentans*) and regulation of glucose and  
320 fat transport (*Erysipelatoclostridium*). Males, on the other hand, only harboured more *Pirellulales*.  
321 No predicted metabolic pathway was found to be differentially abundant with sex (Tables S7-S8).

322 Female reproductive state did not influence any alpha diversity metric (Table S9, Figure  
323 S10A) and was not a significant factor influencing beta diversity between samples (Table S10,  
324 Figure S10B). Very few taxa were differentially abundant according to female reproductive state  
325 (Table S11 and S12). Pregnant females harboured more *Verrucomicrobiota* (class  
326 *Verrucomicrobiae*) and *Epsilonbacteraeota* than cycling and lactating females (Table S12). In  
327 particular, the genus *Helicobacter* (within the family *Epsilobacteroaeota*) was highly prevalent  
328 in pregnant females (Table S12), is a presumed pathogen. No predicted metabolic pathways were  
329 found to differ based on reproductive state (Table S13-S14). Age did not influence any metric of  
330 alpha diversity (Table 1 and S3, Figure S11A) or beta diversity (Table 2, Figure S11B), and no  
331 bacterial taxa (Table S6) or predicted metabolic pathways (Table S7-S8) were differentially  
332 abundant between young and old adults.

333

## 334 **DISCUSSION**

335 Our findings are consistent with the hypothesis that changes in the gelada gut microbiome may  
336 help animals cope with the altered food availability and increased thermoregulatory demands  
337 associated with seasonality. First, the gelada gut microbiome was highly plastic and responded  
338 rapidly to seasonal fluctuations in climate – particularly rainfall (a proxy for available foods).  
339 Second, an increase in predicted bacterial functions involved in energy, amino acid, and lipid  
340 metabolism during both drier and colder periods suggested increased production of SCFAs, and  
341 more efficient digestion in energetically and thermoregulatory challenging periods. We further  
342 found that individual identity and social group explained nearly a third of the variation of the  
343 gelada microbiome, while other individual traits such as sex, reproductive state, and age had little  
344 effect on gut microbiome composition and function.

345         Rainfall was the strongest ecological factor influencing changes in the gelada gut  
346 microbiome, explaining ~3.3% of overall microbiome composition. In particular,  
347 cellulolytic/fibrolytic and fermentative bacterial taxa increased during wetter periods when grass,  
348 which is mostly composed of cellulose, was the primary food source, while amylolytic and  
349 methanogenic bacterial taxa increased during drier periods, when geladas incorporated more starch  
350 (i.e. amylose) and lignified food into their diet. This effect of rainfall on the gut microbiome was  
351 strong, despite the fact that geladas exhibit only moderate dietary changes (i.e. from only grass to  
352 less grass and more underground organs - but from the same plant species) compared to other  
353 mammals living in more seasonal environments, e.g. that switch from ripe fruits to more folivorous  
354 diets (black howler monkeys: Amato et al. 2015; gorillas, *Gorilla gorilla gorilla* and *G. beringei*  
355 *beringei*: Gomez et al. 2016; Hicks et al. 2018). This pattern highlights the importance of the gut  
356 microbiome for geladas in processing their unique diet across seasons.

357           The efficiency of grass digestion in wet periods seems to rely on a syntropy between the  
358 first cellulolytic degraders (*Ruminococcaceae*, *Lachnospiraceae*, *Fibrobacteraceae*,  
359 *Spirochaetes*) and a high diversity of secondary fermenters (*Prevotellaceae* and *Bacteroidales*),  
360 which all increase in abundance during the wet season. The first degraders attach first to the plant  
361 cell walls and hydrolyse cellulose, hemicellulose, and xylan into smaller polysaccharides and  
362 oligosaccharides (Biddle et al. 2013; White et al. 2014), while secondary fermenters ferment those  
363 soluble polysaccharides into more simple sugars (Flint et al. 2008, 2012). *Ruminococcaceae* and  
364 *Lachnospiraceae* are the two main cellulolytic taxa in mammalian gut and are commonly  
365 increasing in prevalence when animals eat more leaves and plants (Amato et al. 2015; Springer et  
366 al. 2017). In terms of secondary fermenters, *Prevotella* are widely known for their role in breaking  
367 down non-cellulosic polysaccharides and pectin (Flint et al. 2012; White et al. 2014). They are the  
368 major constituent (~70%) of rumen bacteria (van Gylswyk 1990), and commonly increase in high  
369 fiber or fruit diets (Rampelli et al. 2015; Kovatcheva-Datchary et al. 2015; Gomez et al. 2016;  
370 Springer et al. 2017). Members of *Bacteroidales* - and particularly from the *Bacteroides* genus -  
371 have some of the largest repertoires of carbohydrate degrading activities and are able to ferment a  
372 broad range of plant polysaccharides (Salyers et al. 1977; Comstock and Coyne 2003; Flint et al.  
373 2012; El Kaoutari et al. 2013). The increase in these cellulolytic/fibrolytic taxa and the high  
374 versatility of the secondary fermenters likely allow geladas to optimally extract nutrients from  
375 grasses eaten during wet periods.

376           In contrast, during drier periods, when geladas relied more on underground storage organs,  
377 we found a corresponding increase in microbial families involved in amylolytic and saccharolytic  
378 activities (*Succinivibrionaceae*, *Streptococcaceae*, *Christensenellaceae*). Interestingly,  
379 *Succinivibrionaceae* also increased during periods of energetic stress in Tibetan macaques

380 (*Macaca thibetana*) (Sun et al. 2016) and during the dry season in the Hazda hunter gatherers of  
381 Tanzania (Smits et al. 2017), suggesting that it might help hosts cope with diet-related energy  
382 shortfalls. The gelada microbiome during the dry season was also characterized by an increase in  
383 *Methanobrevibacter*, a genus containing hydrogenotrophic archaea that converts hydrogen and  
384 formate into methane (Miller et al. 1982). The simultaneous enrichment of efficient hydrogen-  
385 producers (e.g. *Christensenellaceae* (Morotomi et al. 2012), *Hydrogenoanaerobacterium*: (Song  
386 and Dong 2009)) and formate-producers (*Succinivibrionaceae*: (O'Herrin and Kenealy 1993)),  
387 combined with methanogens during the dry season suggest that these taxa work together in  
388 syntropy to improve the efficiency of polysaccharide fermentation from starch in the gut in dry  
389 periods (Samuel and Gordon 2006; Basseri et al. 2010). In mice and humans, a higher abundance  
390 of methanogenic archaea was found to increase calorie harvest from diet, facilitate SCFA  
391 production by other fermentative bacteria, and stimulate lipogenesis (Samuel and Gordon 2006;  
392 Zhang et al. 2009; Basseri et al. 2010; Mathur et al. 2013).

393 Finally, drier periods were also characterized by a large increase in the *RFP12* family (i.e.  
394 ~30% versus ~18% in wetter periods) from the *Kiritimatiellaota* phylum. The *RFP12* family  
395 remains poorly characterized but is increasingly recognized as being a keystone bacterial group in  
396 the hindgut of horses (Steelman et al. 2012; Costa et al. 2015; Edwards et al. 2020), and a common  
397 inhabitant of the rumen of sheep or cattle (Wang et al. 2017; De Mulder et al. 2017; Ribeiro et al.  
398 2017). This suggests that it might be a keystone bacterial group for the digestion of some  
399 underground food components commonly eaten by the geladas during dry periods.

400 At the functional level, bacterial genes involved in energy, amino acid, and lipid  
401 metabolism increased in prevalence during the dry season. In particular, metabolic pathways  
402 linked to cellular respiration, methanogenesis, and carbon fixation pathways of prokaryotes

403 became more common, strongly suggesting that both bacterial energy production and cellular  
404 activity were stimulated during this time. One interpretation of this data is that the increase in  
405 cellular activity simply reflects a dietary switch to starch, which is easier to hydrolyse than  
406 cellulose, and thus might more readily provoke a stimulation of bacterial activity and carbohydrate  
407 fermentation. Alternatively, the stimulation of bacterial energy metabolism and cellular activity  
408 could reflect a higher production of SCFAs by gut bacteria, supplying the host with additional  
409 energy in periods of nutrient restriction (when relying on fallback foods) (Russell and Rychlik  
410 2001; Zhang et al. 2016). Similar increases in predicted bacterial energy metabolism have been  
411 found in energetically challenging environments (e.g. high altitude) in several other mammalian  
412 species and were correlated with higher SCFA production (Zhang et al. 2016; Li et al. 2018).  
413 Analysis of fecal SCFA profiles in geladas would help to identify if this is also the case in this  
414 high-altitude species.

415         While it is clear that diet shifts during drier periods, it remains unknown if (and to what  
416 extent) geladas are nutritionally or energetically constrained during this time. Grass availability  
417 declines and geladas spend more time foraging and digging for underground plant parts during the  
418 dry season (Hunter 2001; Jarvey et al. 2018). Such underground foods are usually considered  
419 fallback foods because individuals rely on them only when grass is less available and because they  
420 require long processing times (Venkataraman et al. 2014; Jarvey et al. 2018). However, one study  
421 (Hunter 2001) found that geladas obtain just as much, or even more, calories from underground  
422 storage organs as they do from grass. Whether this increased caloric intake is offset by increased  
423 foraging costs is currently unknown. However, even if increased foraging costs were  
424 demonstrated, our data suggests that the gut microbiota may increase digestive efficiency from



425 starchy food and thereby help geladas maintain or improve energetic status during the dry season.  
426 Future studies on seasonal changes in energy balance will help resolve this issue.

427         In contrast to the effect of rainfall, we found mixed evidence for the effect of temperature  
428 on the gut microbiome. Temperature only explained ~0.33% of variation in the gelada gut  
429 microbiome composition. Furthermore, few taxa shifted in abundance between the coldest and  
430 hottest months, and most taxa affected by temperature were also affected by rainfall (although the  
431 reverse was not true). This might be explained by the fact that rainfall (and thus diet) still covary  
432 with temperature to some extent (Pearson's correlation coefficient = 0.20): geladas rely the most  
433 on underground foods in the hot-dry season (Feb to May) and the most on grass on the cold-wet  
434 season (Jun to Sep) (Jarvey et al. 2018). The cold-dry season (Oct to Jan), however, displays a  
435 mixed pattern of diet and temperature: grass availability is still high in Oct-Nov (following the  
436 rainy season) but decreases markedly in Dec-Jan (Jarvey et al. 2018; Tinsley Johnson et al. 2018).  
437 These two months are thus characterized by the introduction of underground foods in the diet and  
438 are also incidentally the coldest months of the year, making them likely the most challenging times  
439 for geladas (compounding nutritional and thermoregulatory challenges). Accordingly, cold periods  
440 were characterized by an increase in two amyolytic and lactate-producing taxa (*Streptococcus*,  
441 *Lactobacillus*), presumably to more efficiently extract starch from the underground foods. At the  
442 functional level, the energy and lipid metabolism of bacteria were also stimulated in the cold  
443 months, further suggesting some role of gut bacteria in stimulating host digestive efficiency and  
444 energy metabolism during thermoregulatory-demanding times.

445         These seasonal changes that increase energy production during colder periods may come  
446 at some cost. Such trade-offs have been proposed where shifts that benefit one aspect of host  
447 physiology consequently lead to a decrease in other microbes that may also be necessary for the

448 host. For example, microbes that promote host digestive efficiency and energy metabolism may  
449 also promote inflammation or even suppress immune function (Vijendravarma et al. 2015; Reese  
450 and Kearney 2019). We did not detect any obvious evidence of these tradeoffs in geladas, but  
451 future work that incorporates detailed host immunological and functional microbial data is needed  
452 to help determine if such trade-offs exist.

453 Finally, the present study found that the gelada gut microbiome was largely explained by  
454 individual identity (20%), a pattern consistent with data from a range of vertebrates (Bik et al.  
455 2016; Antwis et al. 2018; Trosvik et al. 2018; Kolodny et al. 2019), including humans (Costello et  
456 al. 2009; Human Microbiome Project Consortium 2012). However, the effect of social group was  
457 lower in geladas than reported for other social mammals (geladas: 6.0% vs. e.g. yellow baboon,  
458 *Papio cynocephalus*: 18.6% of variation explained (Tung et al. 2015), black howler monkey: 14%  
459 (Amato et al. 2017), ring-tailed lemurs, *Lemur catta*: 21 % (Bennett et al. 2016), Welsh Mountain  
460 ponies: 14%: (Antwis et al. 2018)). The combination of large individual effects with weak unit  
461 effects closely resembles data reported for the Guassa gelada population (Trosvik et al. 2018),  
462 suggesting a general, but consistent gelada pattern. The weak unit-level effects may result from  
463 the unique social system of geladas: because social units often aggregate into large bands whose  
464 composition change regularly, geladas may be characterized by a higher rate of inter-unit microbial  
465 transmission compared with other primates. Future studies should explore in more detail the intra-  
466 individual fluctuation in gut microbiome composition, and whether group differences in ranging  
467 patterns may explain these differences.

468 Other individual predictors, namely age, sex, and female reproductive state, had a very  
469 limited effect on the gut microbiome, mirroring results in other mammals (yellow baboons: (Tung  
470 et al. 2015; Ren et al. 2016), ring-tailed lemurs: (Bennett et al. 2016), Verreaux's sifakas,

471 *Propithecus verreauxi*: (Springer et al. 2017), chimpanzees, *Pan troglodytes schweinfurthii*:  
472 (Degnan et al. 2012), rhesus monkeys, *Macaca mulatta*: (Adriansjach et al. 2020), Welsh  
473 Mountain ponies (Antwis et al. 2018), domestic dog, *Canis lupus familiaris*: (Mizukami et al.  
474 2019), but see black howler monkeys: (Amato et al. 2014) or Egyptian fruit bats, *Rousettus*  
475 *aegyptiacus*: (Kolodny et al. 2019)). Although female geladas harbored higher microbial richness  
476 than males, this resulted in minimal differences in gut microbial composition and predicted  
477 function. Compared to males, females had higher abundance of *Proteobacteria* and *Lactobacillus*.  
478 These two bacterial taxa that were previously reported to increase during pregnancy and lactation  
479 in humans and primates (Koren et al. 2012; Mallott and Amato 2018), and that act as early  
480 colonizers of the infant gut (Matsumiya et al. 2002; Martín et al. 2007; Shin et al. 2015).  
481 Additionally, pregnant female geladas harbored more *Helicobacter*, a potentially pathogenic genus  
482 (Chichlowski et al. 2008; Gao et al. 2018). An increase in potentially pathogenic microbes in  
483 pregnant females was also observed in black howler monkeys (Amato et al. 2014) and was  
484 hypothesized to be the consequence of a trade-off between reproduction and immunity. These  
485 dynamics warrant further investigation.

486 Overall, the gut microbiome of geladas seems to be highly plastic and can respond rapidly  
487 to changes in host diet and thermoregulatory demands. Stimulation of bacteria cellular activity  
488 could allow geladas to maintain adequate or even improved energetic balance during dry and cold  
489 periods. Our study adds to an increasing body of literature suggesting that the gut microbiota is an  
490 important system providing dietary and metabolic flexibility for the host and might be a key factor  
491 influencing the acclimatization to changing environments (Candela et al. 2012; Alberdi et al. 2016;  
492 Macke et al. 2017). In addition to fostering phenotypic plasticity, the gut microbiome is  
493 increasingly hypothesized to contribute to host evolution and speciation (Amato 2016; Alberdi et

494 al. 2016; Macke et al. 2017) given the strong host phylogenetic signal in mammalian microbiome  
495 composition and function (Groussin et al. 2017; Amato et al. 2019) and evidence of microbiome  
496 heritability (Goodrich et al. 2014; Blekhman et al. 2015; Waters and Ley 2019). To the extent that  
497 microbiomes affect host phenotypes under selection, they will also affect host evolutionary  
498 trajectories. In the case of geladas, a shift in gut microbiome composition was probably an  
499 important adaptive mechanism that allowed members of the *Theropithecus* genus to adopt a  
500 specialized dietary niche and diversify rapidly from *Papio* ~5 million years ago (Jablonski 2005).  
501 Contrary to host adaptive genetic mutations, which occur over the course of many generations, the  
502 gut microbiota can shift in response to changes in host diet in a matter of days (David et al. 2014).  
503 Given that the common ancestor of *Theropithecus* and *Papio* was omnivorous (Jolly 1970; Dunbar  
504 1976), dietary flexibility provided by the gut microbiome may have been an important first step  
505 allowing members of *Theropithecus* to exploit new grassland habitats in East Africa, leading to  
506 the evolution of a specialized diet and, ultimately, further genetic and phenotypic adaptation.  
507 Future research in geladas and other mammals with peculiar dietary adaptations will further  
508 uncover how the gut microbiota influences host ecology, fitness, and the evolution of wild animal  
509 populations, and determine how an adaptable and heritable microbial community might have  
510 played a key role in supporting expansion into new habitats.

511

## 512 **MATERIAL & METHODS**

### 513 *Study population and fecal sample collection*

514 We collected fecal samples from a wild population of geladas living in the Simien Mountains  
515 National Park, in northern Ethiopia (13°15'N, 38°00'E). Samples were collected over a four-year  
516 period between Jan 2015 and Feb 2019. Geladas live in multi-level societies, where reproductive  
517 units (comprising a leader male, several adult females, their offspring and occasionally 1–2

518 follower males) and bachelor groups (comprising between 1-10 young adult males) form the  
519 smallest levels of the society, that forage and sleep together in a “band” sharing the same  
520 homerange (Snyder-Mackler et al. 2012). Since Jan 2006, the Simien Mountains Gelada Research  
521 Project (SMGRP) has collected demographic and behavioral data on over 200 individuals from  
522 two bands. All individuals are habituated to human observers on foot and are individually  
523 recognizable. Dates of birth of individuals were established using a combination of known (N=42)  
524 and estimated (N=89) birth dates. Estimated birth dates were calculated by using the mean  
525 individual age at major life-history milestones in our population (e.g. sexual maturation or first  
526 birth for females and canine eruption for males) (Beehner et al. 2009; Roberts et al. 2017). Birth  
527 dates of unknown immigrant males were estimated using an established protocol based on body  
528 size and other age-related morphological characteristics (Beehner et al. 2009). Here, we focused  
529 only on samples from adult males and females. Adult males were included when they reached 7  
530 years of age. At this age, males have reached adult body size in stature but not in weight (Beehner  
531 et al. 2009; Lu et al. 2016), and most males have dispersed into a non-natal group (i.e. 96% of our  
532 male samples, males could thus be leaders, followers, bachelors or natal). Adult females were  
533 included after they had experienced their first sex skin swelling, a marker of reproductive  
534 maturation (which is around 4.65 years old in our population (Roberts et al. 2017)).

535 Fecal samples of known adult and subadult male and female subjects were collected  
536 regularly and opportunistically during the study period. Immediately upon defecation,  
537 approximately 1.5 g of feces was collected in 3 ml of RNA later (Vlčková et al. 2012; Blekhman  
538 et al. 2016), stored at room temperature for up to two months, and subsequently shipped to the  
539 University of Washington (UW). At UW, samples were stored at -80°C until the sequencing  
540 libraries were prepared. A total of 758 samples (620 female samples, 138 male samples) were

541 collected from 131 individuals (83 females, 48 males) (mean±SD=5.79±6.14 samples per  
542 individual, range=1-21) from 28 reproductive units and 4 bachelors groups (mean±SD= 4.69±2.97  
543 number of individuals sampled per unit, range=1-11).

544 The reproductive state of females at the date of sample collection was assigned based on  
545 daily monitoring of individuals for the status of sex skin swellings and the birth of infants. We  
546 assigned the three reproductive states as follows: (1) Cycling began at the first sign of postpartum  
547 sex skin swelling and ended when a female conceived - with conception defined as 183 days (mean  
548 gestation length) before the birth of a subsequent infant (Roberts et al. 2017). (2) Pregnancy started  
549 on the date of conception and ended the day before parturition. (3) Finally, lactation started on the  
550 day of parturition and ended the day before the female's first postpartum swelling. Lactating  
551 females were further categorized as being in early lactation (infant <1 year old) or late lactation  
552 (infant >1 year old). When testing the effect of reproductive state, late lactating females were  
553 removed from the lactating category to include only females that were still nursing at the time of  
554 sample collection (females resume cycling when infants are ~1.5 year old in our population, which  
555 is presumably accompanied by infant weaning around the same time (Roberts et al. 2017)).  
556 Furthermore, because pregnant females can abort their fetus during male takeover of their  
557 reproductive unit (Roberts et al. 2012), some pregnancies might have been misidentified as cycling  
558 based on our method of back-calculating from the date of birth. We therefore removed cycling  
559 females that experienced a takeover in the previous 6 months before the date of sample collection  
560 (N=55 samples) to avoid any misclassification of reproductive state in our analyses.

561

562 *Study site and climatic data*

563 The study area is located at 3200m above sea level and is characterized as an Afroalpine grassland  
564 ecosystem, consisting of grassland plateaus, scrublands, and Ericaceous forests (Puff and  
565 Nemomissa 2005). Fecal samples were collected across the year, with roughly equal coverage  
566 across seasons (244 in cold-dry, 298 in cold-wet and 216 in hot-dry season as defined above). As  
567 part of the long-term monitoring of the SMGRP, daily cumulative rainfall and minimum and  
568 maximum temperature are recorded on a near-daily basis. We used the total cumulative rainfall  
569 over the 30 days prior to the date of fecal sample collection as a proxy for grass availability at the  
570 time of sample collection (Jarvey et al. 2018). In addition, we used the average minimum daily  
571 temperatures in the 30 days preceding the date of sample collection as a proxy of thermoregulatory  
572 constraints. The average minimum temperature is less correlated with cumulative monthly rainfall  
573 than the average maximum temperature in the previous 30 days (correlation coefficient: 0.25  
574 versus -0.56) and, more importantly, is more likely to reflect the physiological effect of  
575 thermoregulation on the body (Beehner and McCann 2008; Tinsley Johnson et al. 2018).

576

### 577 *DNA extraction, sequencing, and data processing*

578 We prepared 16S sequencing libraries using the protocols developed and optimized by the Earth  
579 Microbiome Project and the University of Minnesota Genomics Core (UMGC; (Gohl et al. 2016)).  
580 We extracted microbial DNA from the fecal samples using Qiagen's PowerLyzer PowerSoil DNA  
581 Isolation kit (Qiagen #12855) following the standard protocol. We amplified the hypervariable V4  
582 region of the 16S rRNA gene using PCR primer set 515F  
583 (TCGTCGGCAGCGTCAGATGTGTATAAGAGACAGGTGYCAGCMGCCGCGGTAA) and  
584 806R  
585 (GTCTCGTGGGCTCGGAGATGTGTATAAGAGACAGGGACTACNVGGGTWTCTAA

586 T) from The Human Microbiome Project and a dual-indexing approach (Gohl et al. 2016). Details  
587 of the amplification protocol can be accessed at <https://smack-lab.com/protocols/>. The first PCR  
588 round aimed at amplifying the V4 region. Each 25 µl PCR reaction well consisted of 12.5 µl of  
589 Nebnext Ultra II Q5 mastermix, 1.0 µl of each primer, and 25 ng of total DNA in 10.5 µl of  
590 nuclease-free water. PCR was performed in an Eppendorf thermocycler with a 100°C heated lid  
591 using the following cycling steps: an initial denaturing for 5 min at 95°C; followed by 15 cycles  
592 of 20 s at 98°C, 15 s at 62°C, 60 s at 72°C; and a final hold at 4°C. We cleaned up the PCR reaction  
593 with a 2:1 ratio of SPRI beads to PCR amplified DNA. The second PCR round aimed at adding a  
594 unique index primer combination to molecularly barcode each sample. We took 4 µl of product  
595 from the first PCR and added 6 µl of Nebnext Ultra II Q5 mastermix and 1 µl of n5 and n7  
596 indexing primers, with each sample being assigned a unique n5/n7 index primer combination. This  
597 12 µl reaction was placed in an Eppendorf thermocycler with a 100°C heated lid, denatured for 5  
598 min at 95°C, and amplified with 10 cycles of 20 s at 98°C, 15 s at 55°C, and 60 s at 72°C with a  
599 final hold at 4°C. After a 2:1 SPRI bead clean-up, amplification of the V4 region was confirmed  
600 in a few samples using an AATI fragment analyzer, and all libraries were quantified using a qubit  
601 fluorometer. The libraries were then pooled in roughly equimolar amounts (each with their own  
602 unique indexing primer combination), spiked with 10% PhiX to increase library complexity, and  
603 sequenced together on a single Illumina NovaSeq 6000 SP 250 bp paired-end sequence flowcell.

604 We analyzed the resulting data using the Quantitative Insights Into Microbial Ecology 2  
605 (QIIME2) platform (Caporaso et al. 2010; Hall and Beiko 2018). After trimming low quality bases  
606 from the de-multiplexed reads, we merged overlapping paired-end reads, and denoised the  
607 sequencing data by filtering and correcting Illumina amplicon sequencing errors using the Divisive  
608 Amplicon Denoising Algorithm 2 (DADA2: (Callahan et al. 2016)) plugin incorporated in



609 QIIME2. DADA2 infers sequences exactly resulting in amplicon sequence variants (ASVs).  
610 Forward and reverse reads were trimmed to 220 and 180 bases, respectively, to remove the low-  
611 quality portion of the sequences. The forward and reverse reads were then merged together and  
612 chimeric sequences were removed. Only samples with more than 20,000 reads were retained for  
613 analysis (following observation of rarefaction curves, Figure S12). After filtering, trimming,  
614 merging, and chimera removal, we retained a total of 348,390,395 reads across the 758 fecal  
615 samples ( $459,618 \pm 815,020$  reads per sample, range=20,109-10,735,588). ASVs were  
616 taxonomically assigned using the q2-feature classifier in QIIME2 against version 132 of the  
617 SILVA database (updated December 2017) (Quast et al. 2013) based on 100% similarity.  
618 Uninformative taxonomic assignments of ASVs found in SILVA (e.g. “wallaby metagenome”,  
619 “unassigned bacteria”, etc.) were converted to “NA” to simplify analysis at higher taxonomic  
620 levels. All ASVs belonging to the order *WCHB1-41* (phylum *Kiritimatiellaeota*) were not assigned  
621 at the family level in the SILVA classification. However, in the Greengene classification (version  
622 13\_8) all ASVs from this order in the gelada gut were assigned to the *RFP12* family. Thus, we  
623 attribute the family *RFP12* to all ASVs from the order *WCHB1-41* in SILVA classification.

624

### 625 *Statistical analyses*

626 The count and taxonomy files generated by QIIME2 were imported into R version 3.5.2 (Team  
627 and Others 2013) using the qiime2R package (Bisanz 2008) and analyzed using the phyloseq  
628 package (McMurdie and Holmes 2013). The majority of the 19,606 ASVs in our dataset were  
629 found at very low frequency or only in one sample (71% of ASVs were found in only one sample  
630 and 6.2% of ASVs were not assigned at the phylum level). Thus, we further filtered the count table  
631 to retain only ASVs that had at least 500 reads in total in the dataset (i.e. 0.00014% relative

632 abundance) to eliminate potentially artifactual sequences. With this filtering criteria, only 3,295  
633 ASVs remained, with all of them assigned at the phylum level and most (97%) observed in at least  
634 two samples (Figure S13). Most ASVs could be taxonomically assigned to the class and order  
635 levels (~99%), with assignments decreasing at the family (85%) and genus (61%) levels.

636         The use of rarefaction (i.e. subsampling of the read count in each sample to a common  
637 sequencing depth) has been discouraged due to the loss of information and precision (McMurdie  
638 and Holmes 2014), as well as the use of count normalization methods from the RNA-seq field (e.g.  
639 DESeq2 or edgeR). However, microbiome datasets are more sparse (zero-inflated) and more  
640 asymmetrical than genetic expression datasets (Gloor et al. 2017; Weiss et al. 2017). Thus, we  
641 used a compositional approach when possible (e.g. centered-log-ratio normalization of the counts  
642 and Aitchison distance for beta diversity analysis) (Gloor et al. 2016, 2017), controlling for sample  
643 sequencing depth in multivariate analyses to account for repeated samples from the same  
644 individual.

645         We replicated alpha- and beta-diversity analyses using traditional rarefaction methods to  
646 facilitate comparisons with other studies. To generate the rarefied dataset, we randomly sampled  
647 20,000 reads from the raw fastq files of each sample and processed this new rarefied dataset into  
648 the DADA2 pipeline. This dataset was further filtered to remove the low frequency ASVs (i.e.  
649 ASVs not included in the pool of 3,295 ASVs retained in the full dataset). This resulted in a dataset  
650 containing the same 758 samples, with 2853 ASVs and with relatively homogenous sequencing  
651 depth ( $18205 \pm 1415$  reads per sample, range=7460-19444).

652         All mixed models described below were run using either the lmer (for linear mixed models,  
653 LMMs) or glmer (for binomial and negative binomial generalized linear mixed models, GLMMs)  
654 functions of the lme4 package (Bates et al., 2014). All quantitative variables (i.e. cumulative

655 rainfall, averaged temperature, and age) were z-transformed to have a mean of zero and a standard  
656 deviation of one to facilitate model convergence. The significance of the fixed factors was tested  
657 using a likelihood ratio test, LRT (assuming an asymptotic chi-square distribution of the test  
658 statistic) via the drop1 function. To test for significant pairwise differences between levels of  
659 multilevel categorical variables (i.e. reproductive state), *post hoc* Tukey's Honest Significant  
660 Difference tests were carried out using the multcomp package in R (Hothorn et al. 2008).

661

#### 662 Alpha-diversity analyses

663 We calculated three measures of alpha diversity: observed richness (the total number of different  
664 ASVs in a sample), Shannon diversity index (accounts for both richness and evenness of ASVs in  
665 a sample), and Faith's phylogenetic diversity (accounts for phylogenetic distance between  
666 bacterial species, using the picante package (Kembel et al. 2010)). We modeled each alpha  
667 diversity metric using linear mixed models: (i) as a function of age, sex, cumulative monthly  
668 rainfall, average monthly minimum temperature, and sequencing depth of the sample (N=758  
669 samples), and (ii) as a function of reproductive state (cycling, early lactating and pregnant), age,  
670 cumulative monthly rainfall, and average monthly minimum temperature in samples collected  
671 from females (N=439). Individual identity and unit membership were included as random effects  
672 to control for individual and unit repetition across samples. We also ran the same models on the  
673 rarefied dataset (Table S15).

674

#### 675 Beta-diversity analyses

676 We then assessed how the same predictors were associated with between-sample community  
677 dissimilarity. To account for differences in sequencing depth between samples, the counts were

678 normalized using the centered-log-ratio (CLR) method (and using a pseudocount of 0.65 for zero  
679 counts) from the “compositions” package (van den Boogaart and Tolosana-Delgado 2008). We  
680 then calculated the Aitchison distance between samples (i.e. simply the Euclidean distance  
681 between samples after clr transformation of the counts) (Aitchison et al. 2000) and conducted a  
682 Principal Component Analysis (PCA) (function “prcomp”) to visually represent between-samples  
683 dissimilarity according to the predictors. This approach has been recommended for microbiome  
684 datasets (Gloor et al. 2017), and allows for the projection of each sample onto individual principal  
685 components (PCS) and the variable loadings of ASVs onto each PC. While the first axis of  
686 variation correlated mostly with rainfall (Figure 1C), the second PCA axis was correlated with  
687 sequencing depth, and explained 11% of the variation (Figure S14). We used Permutational  
688 Multivariate Analysis of Variance (PERMANOVA) tests to assess the effect of the predictors on  
689 the Aitchison distance between samples (using using 10,000 permutations and the “adonis2”  
690 function from the “vegan” package (Oksanen et al. 2010)). We ran three different models: (1)  
691 including all samples where we tested only the effect of individual identity and sequencing depth,  
692 (2) including all samples where we tested the effect of unit, age, sex, cumulative monthly rainfall,  
693 average monthly minimum temperature, and sequencing depth of the sample and (3) including  
694 only female samples where we tested the effect of unit, reproductive state, age, cumulative monthly  
695 rainfall and average monthly minimum temperature. In models 2 and 3, individual identity was  
696 included as a blocking factor (“strata”) to control for repeated sampling. We also replicated beta  
697 diversity analysis on the rarefied dataset. We ran PERMANOVA tests using three complementary  
698 pairwise dissimilarity metrics (Bray-Curtis distance, unweighted and weighted UniFrac distances)  
699 to assess between-sample variation according to the same predictors (the same three models). Beta  
700 diversity results remained qualitatively similar (Table S16).

701

## 702 Differential abundance testing

703 We examined how our predictors were associated with differential abundance of bacteria (at the  
704 phylum, class, order, family and genus levels) using negative binomial GLMMs. Compared to  
705 LMMs, negative binomial mixed models are better equipped to handle over-dispersed and zero-  
706 inflated distributions that often characterize microbiome datasets (Zhang et al. 2018). They also  
707 facilitate tests of several independent predictors while taking into account longitudinal designs  
708 including random effects. We first aggregated the counts (i.e. the number of reads per taxa and per  
709 sample) at the taxonomic level of interest. Only taxa that had an average relative abundance across  
710 samples  $\geq 0.01\%$  were tested. Then, for a given taxa, the count per sample was modeled as a  
711 function of: (1) age, sex, cumulative monthly rainfall and averaged monthly minimum temperature  
712 (all samples), or (2) female reproductive state, age, cumulative monthly rainfall and averaged  
713 monthly minimum temperature (female samples only). The log-transformed number of reads per  
714 sample was included as an offset term to control for variation in sequencing depth across samples.  
715 Individual identity and unit membership were included as random effects in all models. When  
716 negative binomial models failed to converge in some taxa, we converted the counts in  
717 presence/absence and modeled them with binomial GLMMs. Benjamini-Hochberg corrected p-  
718 values  $< 0.05$  were considered statistically significant.

719

## 720 Functional profiling of microbiota

721 We estimated the bacterial and archaeal genes present in the metagenomes of each sample using  
722 Phylogenetic Investigation of Communities by Reconstruction of Unobserved States version 2  
723 (PICRUSt2) (Douglas et al. 2019). In brief, ASVs were aligned to reference sequences using

724 HMMER (Finn et al. 2011) and placed into a reference tree using EPA-NG (Barbera et al. 2019)  
725 and gappa (Czech 2019). PICRUSt2 normalizes for multiple 16S gene copies in bacteria using  
726 castor, a hidden state prediction tool (Louca and Doebeli 2018). The normalized data were used to  
727 predict gene family profiles, and mapped onto gene pathways using MinPath (Ye and Doak 2009).  
728 We followed the default protocols outlined on the PICRUSt2 GitHub page  
729 (<https://github.com/picrust/picrust2/wiki>). We investigated the predicted gene families using the  
730 Kyoto Encyclopedia of Genes and Genomes (KEGG) Orthology (KO) database. The accuracy of  
731 the PICRUSt2 predictions for each sample were assessed by calculating the weighted Nearest  
732 Sequence Taxon Index (NSTI) score, a measure of how similar the bacteria from the sample are  
733 to reference genome sequences. The average NSTI value across all samples was high in geladas  
734 (mean±SD=0.60±0.13) compared to other mammals (Douglas et al. 2019), so the results of this  
735 analysis should be interpreted with caution. Five ASVs (out of 3295) had a NSTI score>2 and were  
736 removed from our final predictions. The association between the relative abundance of functional  
737 categories as estimated by PICRUSt2 and the predictors (on all samples or female samples only)  
738 were examined using LMMs. Only functional pathways that had  $\geq 0.1\%$  relative abundance across  
739 samples were tested. Individual identity and unit membership were included as random effects in  
740 all models.

741

## 742 **DATA AVAILABILITY**

743 All 16S sequence data used in this study are available at the NCBI Sequence Read Archive  
744 (<https://www.ncbi.nlm.nih.gov/>) under BioProject ID PRJNA639843. Data and code (including  
745 how to run the QIIME2 pipeline on our data) are available at:  
746 <https://doi.org/10.5281/zenodo.3932310>.

747 **ACKNOWLEDGEMENTS**

748 We thank the Ethiopian Wildlife Conservation Authority (EWCA), along with the wardens and  
749 staff of the Simien Mountains National Park for permission to conduct research and ongoing  
750 support to our long-term research project. We are also very grateful to the Simien Mountains  
751 Gelada Research Project field team for their help with field data collection, particularly our  
752 primary data collectors: Eshete Jejaw, Ambaye Fanta, Setey Girmay, Atirsaw Adugna, and Dereje  
753 Bewket. Special thanks to Johannes R. Björk and Elizabeth Archie for stimulating discussion about  
754 microbiome analyses and sharing code. This research was funded by the National Science  
755 Foundation (BCS-1723228, BCS-1723237, BCS-2010309, BCS-0715179, IOS-1255974, IOS-  
756 1854359). KRA is supported as a fellow in the CIFAR ‘Humans and the Microbiome’ program.  
757 NSM was supported by the National Institutes of Health (R00-AG051764). The long-term gelada  
758 research was supported by the University of Michigan, Stony Brook University, and Arizona State  
759 University.

760

761 **AUTHOR CONTRIBUTIONS**

762 Conceptualization, Data curation, Formal analysis, Investigation, Visualization: A.B, A.L., N.S.M;  
763 Methodology: A.B., S.S., A.M., R.P.; Writing – Original Draft: A.B, A.L., N.S.M; Writing –  
764 Review & Editing: all authors; Funding Acquisition: A.L.,N.S.M.,J.C.B., T.J.B.,L.R.;  
765 Supervision: A.L. and N.S.M.

766

767 **COMPETING INTERESTS**

768 The authors declare that they have no competing interests.

769

## 770 REFERENCES

- 771 Adriansjach J, Baum ST, Lefkowitz EJ, van Der Pol WJ, Buford TW, Colman RJ. 2020. Age-  
772 related differences in the gut microbiome of Rhesus macaques. *J Gerontol A* **75**:1293-1298
- 773 Aitchison J, Barceló-Vidal C, Martín-Fernández JA, Pawlowsky-Glahn V. 2000. Logratio analysis  
774 and compositional distance. *Math Geol* **32**:271–275.
- 775 Alberdi A, Aizpurua O, Bohmann K, Zepeda-Mendoza ML, Gilbert MTP. 2016. Do vertebrate gut  
776 metagenomes confer rapid ecological adaptation? *Trends Ecol Evol* **31**:689–699.
- 777 Amato KR. 2016. Incorporating the gut microbiota into models of human and non-human primate  
778 ecology and evolution. *AJPA* **159**:196-215.
- 779 Amato KR, G Sanders J, Song SJ, Nute M, Metcalf JL, Thompson LR, Morton JT, Amir A, J  
780 McKenzie V, Humphrey G, Gogul G, Gaffney J, L Baden A, A O Britton G, P Cuzzo F, Di  
781 Fiore A, J Dominy N, L Goldberg T, Gomez A, Kowalewski MM, J Lewis R, Link A, L  
782 Sauther M, Tecot S, A White B, E Nelson K, M Stumpf R, Knight R, R Leigh S. 2019.  
783 Evolutionary trends in host physiology outweigh dietary niche in structuring primate gut  
784 microbiomes. *ISME J* **13**:576–587.
- 785 Amato KR, Leigh SR, Kent A, Mackie RI, Yeoman CJ, Stumpf RM, Wilson BA, Nelson KE,  
786 White BA, Garber PA. 2015. The gut microbiota appears to compensate for seasonal diet  
787 variation in the wild black howler monkey (*Alouatta pigra*). *Microbial Ecology*. **69**:434-443.
- 788 Amato KR, Leigh SR, Kent A, Mackie RI, Yeoman CJ, Stumpf RM, Wilson BA, Nelson KE,  
789 White BA, Garber PA. 2014. The role of gut microbes in satisfying the nutritional demands of  
790 adult and juvenile wild, black howler monkeys (*Alouatta pigra*). *Am J Phys Anthropol*  
791 **155**:652–664.
- 792 Amato KR, van Belle S, Di Fiore A, Estrada A, Stumpf R, White B, Nelson KE, Knight R, Leigh  
793 SR. 2017. Patterns in gut microbiota similarity associated with degree of sociality among sex  
794 classes of a neotropical primate. *Microb Ecol* **74**:250–258.
- 795 Antwis RE, Lea JMD, Unwin B, Shultz S. 2018. Gut microbiome composition is associated with  
796 spatial structuring and social interactions in semi-feral Welsh Mountain ponies. *Microbiome*.  
797 **6**:207.
- 798 Bäckhed F. 2011. Programming of host metabolism by the gut microbiota. *Annals of Nutrition and*  
799 *Metabolism*. **2**:44-52.



- 800 Barbera P, Kozlov AM, Czech L, Morel B, Darriba D, Flouri T, Stamatakis A. 2019. EPA-ng:  
801 Massively parallel evolutionary placement of genetic sequences. *Systematic Biology*. **68**:365-  
802 369.
- 803 Basseri RJ, Basseri B, Chong K, Youdim A, Low K, Hwang LJ, Mathur R, Khalili T, Soffer EE,  
804 Chang C, Pimentel M. 2010. W1367 Intestinal methane production in obese humans is  
805 associated with higher body mass index. *Gastroenterology*. **138**:S-708
- 806 Bates D, Maechler M, Bolker B, Walker S. 2014. lme4: Linear mixed-effects models using Eigen  
807 and S4. R package version 1.1-7.
- 808 Beehner JC, Gesquiere L, Seyfarth RM, Cheney DL, Alberts SC, Altmann J. 2009. Testosterone  
809 related to age and life-history stages in male baboons and geladas. *Horm Behav* **56**:472–480.
- 810 Beehner JC, McCann C. 2008. Seasonal and altitudinal effects on glucocorticoid metabolites in a  
811 wild primate (*Theropithecus gelada*). *Physiol Behav* **95**:508–514.
- 812 Bennett G, Malone M, Sauter ML, Cuzzo FP, White B, Nelson KE, Stumpf RM, Knight R,  
813 Leigh SR, Amato KR. 2016. Host age, social group, and habitat type influence the gut  
814 microbiota of wild ring-tailed lemurs (*Lemur catta*). *American Journal of Primatology*. **78**:  
815 883-892.
- 816 Bergman EN, Reid RS, Murray MG, Brockway JM, Whitelaw FG. 1965. Interconversions and  
817 production of volatile fatty acids in the sheep rumen. *Biochem J* **97**:53–58.
- 818 Biddle A, Stewart L, Blanchard J, Leschine S. 2013. Untangling the genetic basis of fibrolytic  
819 specialization by *Lachnospiraceae* and *Ruminococcaceae* in diverse gut communities.  
820 *Diversity* **5**:627–640.
- 821 Bik EM, Costello EK, Switzer AD, Callahan BJ, Holmes SP, Wells RS, Carlin KP, Jensen ED,  
822 Venn-Watson S, Relman DA. 2016. Marine mammals harbor unique microbiotas shaped by  
823 and yet distinct from the sea. *Nat Commun* **7**:10516.
- 824 Bisanz JE. 2018. qiime2R: Importing QIIME2 artifacts and associated data into R sessions. Version  
825 0.99.13.
- 826 Blekhman R, Goodrich JK, Huang K, Sun Q, Bukowski R, Bell JT, Spector TD, Keinan A, Ley  
827 RE, Gevers D, Clark AG. 2015. Host genetic variation impacts microbiome composition across  
828 human body sites. *Genome Biol* **16**:191.
- 829 Blekhman R, Tang K, Archie EA, Barreiro LB, Johnson ZP, Wilson ME, Kohn J, Yuan ML,  
830 Gesquiere L, Grieneisen LE, Tung J. 2016. Common methods for fecal sample storage in field

- 831 studies yield consistent signatures of individual identity in microbiome sequencing data.  
832 *Scientific Reports*. **6**:31519.
- 833 Callahan BJ, McMurdie PJ, Rosen MJ, Han AW, Johnson AJA, Holmes SP. 2016. DADA2: High-  
834 resolution sample inference from Illumina amplicon data. *Nat Methods* **13**:581–583.
- 835 Candela M, Biagi E, Maccaferri S, Turrone S, Brigidi P. 2012. Intestinal microbiota is a plastic  
836 factor responding to environmental changes. *Trends Microbiol* **20**:385–391.
- 837 Caporaso JG, Kuczynski J, Stombaugh J, Bittinger K, Bushman FD, Costello EK, Fierer N, Peña  
838 AG, Goodrich JK, Gordon JI, Huttley GA, Kelley ST, Knights D, Koenig JE, Ley RE,  
839 Lozupone CA, McDonald D, Muegge BD, Pirrung M, Reeder J, Sevinsky JR, Turnbaugh PJ,  
840 Walters WA, Widmann J, Yatsunenkov T, Zaneveld J, Knight R. 2010. QIIME allows analysis  
841 of high-throughput community sequencing data. *Nat Methods* **7**:335–336.
- 842 Carrera SC, Sen S, Heistermann M, Lu A, Beehner JC. 2020. Low rank and primiparity increase  
843 fecal glucocorticoid metabolites across gestation in wild geladas. *Gen Comp Endocrinol*  
844 **293**:113494.
- 845 Chevalier C, Stojanović O, Colin DJ, Suarez-Zamorano N, Tarallo V, Veyrat-Durebex C, Rigo D,  
846 Fabbiano S, Stevanović A, Hagemann S, Montet X, Seimbille Y, Zamboni N, Hapfelmeier S,  
847 Trajkovski M. 2015. Gut microbiota orchestrates energy homeostasis during cold. *Cell*.  
848 **136**:1360-1374
- 849 Chichlowski M, Sharp JM, Vanderford DA, Myles MH, Hale LP. 2008. *Helicobacter typhlonius*  
850 and *Helicobacter rodentium* differentially affect the severity of colon inflammation and  
851 inflammation-associated neoplasia in IL10-deficient mice. *Comp Med* **58**:534–541.
- 852 Comstock LE, Coyne MJ. 2003. *Bacteroides thetaiotaomicron*: a dynamic, niche-adapted human  
853 symbiont. *BioEssays*. **25**:926-929
- 854 Costa MC, Silva G, Ramos RV, Staempfli HR, Arroyo LG, Kim P, Weese JS. 2015.  
855 Characterization and comparison of the bacterial microbiota in different gastrointestinal tract  
856 compartments in horses. *Vet J* **205**:74–80.
- 857 Costello EK, Lauber CL, Hamady M, Fierer N, Gordon JI, Knight R. 2009. Bacterial community  
858 variation in human body habitats across space and time. *Science* **326**:1694–1697.
- 859 David LA, Maurice CF, Carmody RN, Gootenberg DB, Button JE, Wolfe BE, Ling AV, Devlin  
860 AS, Varma Y, Fischbach MA, Biddinger SB, Dutton RJ, Turnbaugh PJ. 2014. Diet rapidly and  
861 reproducibly alters the human gut microbiome. *Nature* **505**:559–563.

- 862 De Filippo C, Cavalieri D, Di Paola M, Ramazzotti M, Pouillet JB, Massart S, Collini S, Pieraccini  
863 G, Lionetti P. 2010. Impact of diet in shaping gut microbiota revealed by a comparative study  
864 in children from Europe and rural Africa. *Proc Natl Acad Sci U S A* **107**:14691–14696.
- 865 Degnan PH, Pusey AE, Lonsdorf EV, Goodall J, Wroblewski EE, Wilson ML, Rudicell RS, Hahn  
866 BH, Ochman H. 2012. Factors associated with the diversification of the gut microbial  
867 communities within chimpanzees from Gombe National Park. *Proc Natl Acad Sci U S A*  
868 **109**:13034–13039.
- 869 De Mulder T, Goossens K, Peiren N, Vandaele L, Haegeman A, De Tender C, Ruttink T, van de  
870 Wiele T, De Campeneere S. 2017. Exploring the methanogen and bacterial communities of  
871 rumen environments: solid adherent, fluid and epimural. *FEMS Microbiol Ecol* **93**:fiw251.
- 872 Dias PAD, Rangel-Negrín A, Canales-Espinosa D. 2011. Effects of lactation on the time-budgets  
873 and foraging patterns of female black howlers (*Alouatta pigra*). *Am J Phys Anthropol* **145**:137–  
874 146.
- 875 Dominy NJ, Vogel ER, Yeakel JD, Constantino P, Lucas PW. 2008. Mechanical properties of plant  
876 underground storage organs and implications for dietary models of early hominins. *Evol Biol*  
877 **35**:159–175.
- 878 Doran D. 1997. Influence of seasonality on activity patterns, feeding behavior, ranging, and  
879 grouping patterns in Tai chimpanzees. *Int J Primatol* **18**:183–206.
- 880 Douglas GM, Maffei VJ, Zaneveld J, Yurgel SN, Brown JR, Taylor CM, Huttenhower C, Langille  
881 MGI. 2019. PICRUSt2: An improved and extensible approach for metagenome inference.  
882 *bioRxiv*. 672295
- 883 Dufour DL, Sauter ML. 2002. Comparative and evolutionary dimensions of the energetics of  
884 human pregnancy and lactation. *Am J Hum Biol* **14**:584–602.
- 885 Dunbar RIM. 1976. Australopithecine diet based on a baboon analogy. *J Hum Evol* **5**:161–167.
- 886 Edwards JE, Shetty SA, van den Berg P, Burden F, van Doorn DA, Pellikaan WF, Dijkstra J, Smidt  
887 H. 2020. Multi-kingdom characterization of the core equine fecal microbiota based on multiple  
888 equine (sub)species. *Animal Microbiome* **2**:1-16.
- 889 El Kaoutari A, Armougom F, Gordon JI, Raoult D, Henrissat B. 2013. The abundance and variety  
890 of carbohydrate-active enzymes in the human gut microbiota. *Nat Rev Microbiol* **11**:497–504.

891 Fashing PJ, Nguyen N, Venkataraman VV, Kerby JT. 2014. Gelada feeding ecology in an intact  
892 ecosystem at Guassa, Ethiopia: Variability over time and implications for theropit and  
893 hominin dietary evolution. *Am J Phys Anthropol* **155**:1–16.

894 Finn RD, Clements J, Eddy SR. 2011. HMMER web server: interactive sequence similarity  
895 searching. *Nucleic Acids Research*. **39**:W29-37

896 Flint HJ, Bayer EA, Rincon MT, Lamed R, White BA. 2008. Polysaccharide utilization by gut  
897 bacteria: potential for new insights from genomic analysis. *Nature Reviews Microbiology*.

898 Flint HJ, Scott KP, Duncan SH, Louis P, Forano E. 2012. Microbial degradation of complex  
899 carbohydrates in the gut. *Gut Microbes* **3**:289–306.

900 Gao J-J, Zhang Y, Gerhard M, Mejias-Luque R, Zhang L, Vieth M, Ma J-L, Bajbouj M, Suchanek  
901 S, Liu W-D, Ulm K, Quante M, Li Z-X, Zhou T, Schmid R, Classen M, Li W-Q, You W-C,  
902 Pan K-F. 2018. Association between gut microbiota and *Helicobacter pylori*-related gastric  
903 lesions in a high-risk population of gastric cancer. *Front Cell Infect Microbiol* **8**:202.

904 Gloor GB, Macklaim JM, Pawlowsky-Glahn V, Egozcue JJ. 2017. Microbiome datasets are  
905 compositional: and this is not optional. *Frontiers in Microbiology*. **8**:2224

906 Gloor GB, Macklaim JM, Vu M, Fernandes AD. 2016. Compositional uncertainty should not be  
907 ignored in high-throughput sequencing data analysis. *Austrian Journal of Statistics*. **45**:73-87

908 Gohl DM, Vangay P, Garbe J, MacLean A, Hauge A, Becker A, Gould TJ, Clayton JB, Johnson  
909 TJ, Hunter R, Knights D, Beckman KB. 2016. Systematic improvement of amplicon marker  
910 gene methods for increased accuracy in microbiome studies. *Nat Biotechnol* **34**:942–949.

911 Gomez A, Rothman JM, Petrzalkova K, Yeoman CJ, Vlckova K, Umaña JD, Carr M, Modry D,  
912 Todd A, Torralba M, Nelson KE, Stumpf RM, Wilson BA, Blekhman R, White BA, Leigh SR.  
913 2016. Temporal variation selects for diet–microbe co-metabolic traits in the gut of *Gorilla* spp.  
914 *ISME J* **10**:514–526.

915 Goodrich JK, Waters JL, Poole AC, Sutter JL, Koren O, Blekhman R, Beaumont M, van Treuren  
916 W, Knight R, Bell JT, Spector TD, Clark AG, Ley RE. 2014. Human genetics shape the gut  
917 microbiome. *Cell*. **159**:789-799

918 Groussin M, Mazel F, Sanders JG, Smillie CS, Lavergne S, Thuiller W, Alm EJ. 2017. Unraveling  
919 the processes shaping mammalian gut microbiomes over evolutionary time. *Nat Commun*  
920 **8**:14319.

- 921 Gursky S. 2000. Effect of seasonality on the behavior of an insectivorous primate, *Tarsius*  
922 *spectrum*. *Int J Primatol* **21**:477–495.
- 923 Hall M, Beiko RG. 2018. 16S rRNA Gene Analysis with QIIME2. *Methods Mol Biol* **1849**:113–  
924 129.
- 925 Hanning I, Diaz-Sanchez S. 2015. The functionality of the gastrointestinal microbiome in non-  
926 human animals. *Microbiome*. **3**:51
- 927 Hicks AL, Lee KJ, Couto-Rodriguez M, Patel J, Sinha R, Guo C, Olson SH, Seimon A, Seimon  
928 TA, Ondzie AU, Karesh WB, Reed P, Cameron KN, Lipkin WI, Williams BL. 2018. Gut  
929 microbiomes of wild great apes fluctuate seasonally in response to diet. *Nat Commun* **9**:1786.
- 930 Hothorn T, Bretz F, Westfall P. 2008. Simultaneous inference in general parametric models. *Biom*  
931 *J* **50**:346–363.
- 932 Human Microbiome Project Consortium. 2012. Structure, function and diversity of the healthy  
933 human microbiome. *Nature* **486**:207–214.
- 934 Hunter CP. 2001. Ecological determinants of gelada ranging patterns (*Theropithecus gelada*).  
935 University of Liverpool.
- 936 Jablonski NG. 2005. *Theropithecus*: The rise and fall of a primate genus. Cambridge University  
937 Press.
- 938 Jarvey JC, Low BS, Pappano DJ, Bergman TJ, Beehner JC. 2018. Graminivory and fallback foods:  
939 annual diet profile of geladas (*Theropithecus gelada*) living in the Simien Mountains National  
940 Park, Ethiopia. *Int J Primatol* **39**:105–126.
- 941 Jolly CJ. 1970. The Seed-Eaters: a new model of hominid differentiation based on a baboon  
942 analogy. *Man* **5**:5–26.
- 943 Kembel SW, Cowan PD, Helmus MR, Cornwell WK, Morlon H, Ackerly DD, Blomberg SP,  
944 Webb CO. 2010. Picante: R tools for integrating phylogenies and ecology. *Bioinformatics*  
945 **26**:1463–1464.
- 946 Kolodny O, Weinberg M, Reshef L, Harten L, Hefetz A, Gophna U, Feldman MW, Yovel Y. 2019.  
947 Coordinated change at the colony level in fruit bat fur microbiomes through time. *Nat Ecol*  
948 *Evol* **3**:116–124.
- 949 Koren O, Goodrich JK, Cullender TC, Spor A, Laitinen K, Bäckhed HK, Gonzalez A, Werner JJ,  
950 Angenent LT, Knight R, Bäckhed F, Isolauri E, Salminen S, Ley RE. 2012. Host remodeling of  
951 the gut microbiome and metabolic changes during pregnancy. *Cell* **150**:470–480.

- 952 Kovatcheva-Datchary P, Nilsson A, Akrami R, Lee YS, De Vadder F, Arora T, Hallen A, Martens  
953 E, Björck I, Bäckhed F. 2015. Dietary fiber-induced improvement in glucose metabolism is  
954 associated with increased abundance of *Prevotella*. *Cell Metab* **22**:971–982.
- 955 Krajmalnik-Brown R, Ilhan Z-E, Kang D-W, DiBaise JK. 2012. Effects of gut microbes on nutrient  
956 absorption and energy regulation. *Nutr Clin Pract* **27**:201–214.
- 957 Li H, Qu J, Li T, Wirth S, Zhang Y, Zhao X, Li X. 2018. Diet simplification selects for high gut  
958 microbial diversity and strong fermenting ability in high-altitude pikas. *Appl Microbiol*  
959 *Biotechnol* **102**:6739–6751.
- 960 Louca S, Doebeli M. 2018. Efficient comparative phylogenetics on large trees. *Bioinformatics*.
- 961 Lu A, Bergman TJ, McCann C, Stinespring-Harris A, Beehner JC. 2016. Growth trajectories in  
962 wild geladas (*Theropithecus gelada*). *Am J Primatol* **78**:707–719.
- 963 Macke E, Tasiemski A, Massol F, Callens M, Decaestecker E. 2017. Life history and eco-  
964 evolutionary dynamics in light of the gut microbiota. *Oikos* **126**:508–531.
- 965 Mallott EK, Amato KR. 2018. The microbial reproductive ecology of white-faced capuchins  
966 (*Cebus capucinus*). *Am J Primatol* **80**:e22896.
- 967 Martín R, Heilig GHJ, Zoetendal EG, Smidt H, Rodríguez JM. 2007. Diversity of the *Lactobacillus*  
968 group in breast milk and vagina of healthy women and potential role in the colonization of the  
969 infant gut. *J Appl Microbiol* **103**:2638–2644.
- 970 Mathur R, Amichai M, Chua KS, Mirocha J, Barlow GM, Pimentel M. 2013. Methane and  
971 hydrogen positivity on breath test is associated with greater body mass index and body fat. *The*  
972 *Journal of Clinical Endocrinology & Metabolism*. **98**:E698-E702
- 973 Matsumiya Y, Kato N, Watanabe K, Kato H. 2002. Molecular epidemiological study of vertical  
974 transmission of vaginal *Lactobacillus* species from mothers to newborn infants in Japanese, by  
975 arbitrarily primed polymerase chain reaction. *Journal of Infection and Chemotherapy*. **8**:43-49
- 976 Mau M, Johann A, Sliwa A, Hummel J, Südekum K-H. 2011. Morphological and physiological  
977 aspects of digestive processes in the graminivorous primate *Theropithecus gelada*—a  
978 preliminary study. *Am J Primatol* **73**:449–457.
- 979 McMurdie PJ, Holmes S. 2014. Waste not, want not: why rarefying microbiome data is  
980 inadmissible. *PLoS Comput Biol* **10**:e1003531.
- 981 McMurdie PJ, Holmes S. 2013. phyloseq: an R package for reproducible interactive analysis and  
982 graphics of microbiome census data. *PLoS One* **8**:e61217.

- 983 McNab BK. 2002. The physiological ecology of vertebrates: a view from energetics. Cornell  
984 University Press.
- 985 Miller TL, Wolin MJ, Conway de Macario E, Macario AJ. 1982. Isolation of *Methanobrevibacter*  
986 *smithii* from human feces. *Appl Environ Microbiol* **43**:227–232.
- 987 Milton K, McBee RH. 1983. Rates of fermentative digestion in the howler monkey, *Alouatta*  
988 *palliata* (primates: ceboidea). *Comp Biochem Physiol A Comp Physiol* **74**:29–31.
- 989 Mizukami K, Uchiyama J, Igarashi H, Murakami H, Osumi T, Shima A, Ishihara G, Nasukawa T,  
990 Une Y, Sakaguchi M. 2019. Age-related analysis of the gut microbiome in a purebred dog  
991 colony. *FEMS Microbiol Lett* **366**.
- 992 Morotomi M, Nagai F, Watanabe Y. 2012. Description of *Christensenella minuta* gen. nov., sp.  
993 nov., isolated from human faeces, which forms a distinct branch in the order *Clostridiales*, and  
994 proposal of *Christensenellaceae* fam. nov. *International journal of systematic and*  
995 *evolutionary microbiology* **62**: 144-149.
- 996 O’Herrin SM, Kenealy WR. 1993. Glucose and carbon dioxide metabolism by *Succinivibrio*  
997 *dextrinosolvens*. *Appl Environ Microbiol* **59**:748–755.
- 998 Oksanen J, Blanchet FG, Kindt R, Legendre P, O’hara RB, Simpson GL, Solymos P, Stevens  
999 MHH, Wagner H. 2010. Vegan: community ecology package. R package version 1.17-4.
- 1000 Popovich DG, Jenkins DJ, Kendall CW, Dierenfeld ES, Carroll RW, Tariq N, Vidgen E. 1997. The  
1001 western lowland gorilla diet has implications for the health of humans and other hominoids. *J*  
1002 *Nutr* **127**:2000–2005.
- 1003 Puff C, Nemomissa S. 2005. Plants of the Simen: a flora of the Simen Mountains and surroundings,  
1004 northern Ethiopia. National Botanic Garden (Belgium).
- 1005 Quast C, Pruesse E, Yilmaz P, Gerken J, Schweer T, Yarza P, Peplies J, Glöckner FO. 2013. The  
1006 SILVA ribosomal RNA gene database project: improved data processing and web-based tools.  
1007 *Nucleic Acids Res* **41**:D590–6.
- 1008 Rampelli S, Schnorr SL, Consolandi C, Turrone S, Severgnini M, Peano C, Brigidi P, Crittenden  
1009 AN, Henry AG, Candela M. 2015. Metagenome sequencing of the Hadza hunter-gatherer gut  
1010 microbiota. *Curr Biol* **25**:1682–1693.
- 1011 Reese AT, Kearney SM. 2019. Incorporating functional trade-offs into studies of the gut  
1012 microbiota. *Curr Opin Microbiol* **50**:20–27.

- 1013 Ren T, Grieneisen LE, Alberts SC, Archie EA, Wu M. 2016. Development, diet and dynamism:  
1014 longitudinal and cross-sectional predictors of gut microbial communities in wild baboons.  
1015 *Environmental Microbiology*. **18**:1312-1325
- 1016 Ribeiro GO, Oss DB, He Z, Gruninger RJ, Elekwachi C, Forster RJ, Yang W, Beauchemin KA,  
1017 McAllister TA. 2017. Repeated inoculation of cattle rumen with bison rumen contents alters  
1018 the rumen microbiome and improves nitrogen digestibility in cattle. *Sci Rep* **7**:1276.
- 1019 Roberts EK, Lu A, Bergman TJ, Beehner JC. 2017. Female reproductive parameters in wild  
1020 geladas (*Theropithecus gelada*). *Int J Primatol* **38**:1–20.
- 1021 Roberts EK, Lu A, Bergman TJ, Beehner JC. 2012. A Bruce effect in wild geladas. *Science*  
1022 **335**:1222–1225.
- 1023 Russell JB, Rychlik JL. 2001. Factors that alter rumen microbial ecology. *Science* **292**:1119–1122.
- 1024 Salyers AA, Vercellotti JR, West SE, Wilkins TD. 1977. Fermentation of mucin and plant  
1025 polysaccharides by strains of *Bacteroides* from the human colon. *Applied and Environmental*  
1026 *Microbiology*. **33**:319-322
- 1027 Samuel BS, Gordon JI. 2006. A humanized gnotobiotic mouse model of host-archaeal-bacterial  
1028 mutualism. *Proceedings of the National Academy of Sciences*. **103**:10011-10016
- 1029 Shin N-R, Whon TW, Bae J-W. 2015. *Proteobacteria*: microbial signature of dysbiosis in gut  
1030 microbiota. *Trends Biotechnol* **33**:496–503.
- 1031 Smits SA, Leach J, Sonnenburg ED, Gonzalez CG, Lichtman JS, Reid G, Knight R, Manjurano A,  
1032 Chagalucha J, Elias JE, Dominguez-Bello MG, Sonnenburg JL. 2017. Seasonal cycling in the  
1033 gut microbiome of the Hadza hunter-gatherers of Tanzania. *Science* **357**:802–806.
- 1034 Snyder-Mackler N, Beehner JC, Bergman TJ. 2012. Defining higher levels in the multilevel  
1035 societies of geladas (*Theropithecus gelada*). *Int J Primatol* **33**:1054–1068.
- 1036 Song L, Dong X. 2009. *Hydrogenoanaerobacterium saccharovorans* gen. nov., sp. nov., isolated  
1037 from H<sub>2</sub>-producing UASB granules. *International journal of systematic and evolutionary*  
1038 *microbiology* **59**: 295-299.
- 1039 Springer A, Fichtel C, Al-Ghalith GA, Koch F, Amato KR, Clayton JB, Knights D, Kappeler PM.  
1040 2017. Patterns of seasonality and group membership characterize the gut microbiota in a  
1041 longitudinal study of wild Verreaux's sifakas (*Propithecus verreauxi*). *Ecology and Evolution*.  
1042 **7**:5732-5745.



- 1043 Steelman SM, Chowdhary BP, Dowd S, Suchodolski J, Janečka JE. 2012. Pyrosequencing of 16S  
1044 rRNA genes in fecal samples reveals high diversity of hindgut microflora in horses and  
1045 potential links to chronic laminitis. *BMC Vet Res* **8**:231.
- 1046 Sun B, Wang X, Bernstein S, Huffman MA, Xia D-P, Gu Z, Chen R, Sheeran LK, Wagner RS, Li  
1047 J. 2016. Marked variation between winter and spring gut microbiota in free-ranging Tibetan  
1048 Macaques (*Macaca thibetana*). *Sci Rep* **6**:26035.
- 1049 Team RC, Others. 2013. R: A language and environment for statistical computing.
- 1050 Tinsley Johnson E, Snyder-Mackler N, Lu A, Bergman TJ, Beehner JC. 2018. Social and  
1051 ecological drivers of reproductive seasonality in geladas. *Behav Ecol* **29**:574–588.
- 1052 Tremaroli V, Bäckhed F. 2012. Functional interactions between the gut microbiota and host  
1053 metabolism. *Nature* **489**:242–249.
- 1054 Trosvik P, de Muinck EJ, Rueness EK, Fashing PJ, Beierschmitt EC, Callingham KR, Kraus JB,  
1055 Trew TH, Moges A, Mekonnen A, Venkataraman VV, Nguyen N. 2018. Multilevel social  
1056 structure and diet shape the gut microbiota of the gelada monkey, the only grazing primate.  
1057 *Microbiome* **6**:84.
- 1058 Tseng C-H, Wu C-Y. 2019. The gut microbiome in obesity. *J Formos Med Assoc* **118**:S3–S9.
- 1059 Tung J, Barreiro LB, Burns MB, Grenier J-C, Lynch J, Grieneisen LE, Altmann J, Alberts SC,  
1060 Blekhman R, Archie EA. 2015. Social networks predict gut microbiome composition in wild  
1061 baboons. *Elife* **4**: e05224
- 1062 Turnbaugh PJ, Gordon JI. 2009. The core gut microbiome, energy balance and obesity. *J Physiol*  
1063 **587**:4153–4158.
- 1064 Turnbaugh PJ, Ley RE, Mahowald MA, Magrini V, Mardis ER, Gordon JI. 2006. An obesity-  
1065 associated gut microbiome with increased capacity for energy harvest. *Nature* **444**:1027–1031.
- 1066 Udén P, Rounsaville TR, Wiggans GR, van Soest PJ. 1982. The measurement of liquid and solid  
1067 digesta retention in ruminants, equines and rabbits given timothy (*Phleum pratense*) hay. *Br J*  
1068 *Nutr* **48**:329–339.
- 1069 van den Boogaart KG, Tolosana-Delgado R. 2008. “compositions”: a unified R package to analyze  
1070 compositional data. *Computers & Geosciences*. **34**:320-338
- 1071 van Gylswyk NO. 1990. Enumeration and presumptive identification of some functional groups of  
1072 bacteria in the rumen of dairy cows fed grass silage-based diets. *FEMS Microbiol Ecol* **6**:243–  
1073 261.

- 1074 van Schaik CP, Brockman DK. 2005. Seasonality in primate ecology, reproduction, and life  
1075 history. *Seasonality in primates: studies of living and extinct human and non-human primates*  
1076 3–20.
- 1077 Venkataraman VV, Glowacka H, Fritz J, Clauss M, Seyoum C, Nguyen N, Fashing PJ. 2014.  
1078 Effects of dietary fracture toughness and dental wear on chewing efficiency in geladas  
1079 (*Theropithecus gelada*). *Am J Phys Anthropol* **155**:17–32.
- 1080 Vijendravarma RK, Narasimha S, Chakrabarti S, Babin A, Kolly S, Lemaitre B, Kawecki TJ. 2015.  
1081 Gut physiology mediates a trade-off between adaptation to malnutrition and susceptibility to  
1082 food-borne pathogens. *Ecology Letters*. **18**:1078-1086.
- 1083 Vlčková K, Mrázek J, Kopečný J, Petrželková KJ. 2012. Evaluation of different storage methods to  
1084 characterize the fecal bacterial communities of captive western lowland gorillas (*Gorilla*  
1085 *gorilla gorilla*). *J Microbiol Methods* **91**:45–51.
- 1086 Wang J, Fan H, Han Y, Zhao J, Zhou Z. 2017. Characterization of the microbial communities along  
1087 the gastrointestinal tract of sheep by 454 pyrosequencing analysis. *Asian-australas J Anim Sci*  
1088 **30**:100–110.
- 1089 Warnecke F, Luginbühl P, Ivanova N, Ghassemian M, Richardson TH, Stege JT, Cayouette M,  
1090 McHardy AC, Djordjevic G, Aboushadi N, Sorek R, Tringe SG, Podar M, Martin HG, Kunin  
1091 V, Dalevi D, Madejska J, Kirton E, Platt D, Szeto E, Salamov A, Barry K, Mikhailova N,  
1092 Kyrpides NC, Matson EG, Ottesen EA, Zhang X, Hernández M, Murillo C, Acosta LG,  
1093 Rigoutsos I, Tamayo G, Green BD, Chang C, Rubin EM, Mathur EJ, Robertson DE,  
1094 Hugenholtz P, Leadbetter JR. 2007. Metagenomic and functional analysis of hindgut  
1095 microbiota of a wood-feeding higher termite. *Nature* **450**:560–565.
- 1096 Waters JL, Ley RE. 2019. The human gut bacteria *Christensenellaceae* are widespread, heritable,  
1097 and associated with health. *BMC Biol* **17**:83.
- 1098 Weiss S, Xu ZZ, Peddada S, Amir A, Bittinger K, Gonzalez A, Lozupone C, Zaneveld JR,  
1099 Vázquez-Baeza Y, Birmingham A, Hyde ER, Knight R. 2017. Normalization and microbial  
1100 differential abundance strategies depend upon data characteristics. *Microbiome*. **5**:27.
- 1101 White BA, Lamed R, Bayer EA, Flint HJ. 2014. Biomass utilization by gut microbiomes. *Annu Rev*  
1102 *Microbiol* **68**:279–296.
- 1103 Wrangham RW. 1980. Bipedal locomotion as a feeding adaptation in gelada baboons, and its  
1104 implications for hominid evolution. *J Hum Evol* **9**:329–331.

- 1105 Ye Y, Doak TG. 2009. A parsimony approach to biological pathway reconstruction/inference for  
1106 genomes and metagenomes. *PLoS Computational Biology*. **5**:e1000465.
- 1107 Zhang H, DiBaise JK, Zuccolo A, Kudrna D, Braidotti M, Yu Y, Parameswaran P, Crowell MD,  
1108 Wing R, Rittmann BE, Krajmalnik-Brown R. 2009. Human gut microbiota in obesity and after  
1109 gastric bypass. *Proceedings of the National Academy of Sciences*. **106**:2365-2370
- 1110 Zhang X, Pei Y-F, Zhang L, Guo B, Pendegraft AH, Zhuang W, Yi N. 2018. Negative binomial  
1111 mixed models for analyzing longitudinal microbiome data. *Frontiers in Microbiology*. **9**:1683.
- 1112 Zhang Z, Xu D, Wang L, Hao J, Wang J, Zhou X, Wang W, Qiu Q, Huang X, Zhou J, Long R,  
1113 Zhao F, Shi P. 2016. Convergent evolution of rumen microbiomes in high-altitude mammals.  
1114 *Curr Biol* **26**:1873–1879.
